# Transcriptional control and exploitation of an immune-responsive family of retrotransposons in Arabidopsis

Angélique Deleris\* <sup>✉1</sup>, Jérôme Zervudacki\*<sup>1</sup>, Agnès Yu<sup>1,2</sup>, Jingyu Wang<sup>1</sup>, Jan Drouaud<sup>1,3</sup>, Lionel Navarro<sup>✉1</sup>

\* These authors contributed equally to this work

✉ Correspondence: [deleris@biologie.ens.fr](mailto:deleris@biologie.ens.fr), [linavarr@biologie.ens.fr](mailto:linavarr@biologie.ens.fr)

1. Institut de biologie de l'Ecole normale supérieure (IBENS), Ecole normale supérieure, CNRS, INSERM, PSL Research University, 75005 Paris, France

2. Present address: Institut Jean-Pierre Bourgin, UMR1318 INRA AgroParisTech CNRS, Université Paris-Saclay, 78000 Versailles, France

3. Present address: Université of Picardie Jules Vernes, 80000 Amiens, France

## ABSTRACT

Mobilization of transposable elements (TEs) in plants has been recognized as a driving force of evolution and adaptation, in particular by providing genes with regulatory modules that impact their transcription. In this study, we employed an *ATCOPIA93* Long terminal repeats (LTR) promoter-GUS fusion to show that this retrotransposon behaves like an immune-responsive gene during plant defense in Arabidopsis. We also showed that the reactivation of the endogenous *ATCOPIA93* copy “EVD”, in the presence of bacterial stress, is not only negatively regulated by DNA methylation but also by Polycomb-mediated silencing -a mode of repression typically found at protein-coding and microRNA genes. Interestingly, one of the *ATCOPIA93*-derived soloLTRs is located upstream of the disease resistance gene *RPP4* and is devoid of either DNA methylation or H3K27m3 marks. Through loss-of-function experiments, we demonstrated that this soloLTR is required for proper expression of *RPP4* during plant defense, thus linking the responsiveness of *ATCOPIA93* to biotic stress and the co-option of its LTR for plant immunity.

**Keywords:** Arabidopsis, DNA methylation, Innate immunity, Polycomb silencing, Transposable element.

## **Introduction**

TEs are repeated sequences that can potentially move and multiply in the genome. Their mobilization has been recognized as a driving force of evolution and adaptation in various organisms, in particular by providing genes with regulatory modules that can create or impact transcriptional programs (Chuong *et al*, 2016). The study of TE regulation is thus important in order to understand both the conditions for their transposition but also their influence, as full-length or truncated elements, on nearby gene regulation. This role in *cis* has been demonstrated in plants by artificially inducing insertions that confer gene regulation, e.g., the rice TE *mPing* (Naito *et al*, 2009) or the Arabidopsis TE *ONSEN* (Ito *et al*, 2011). However, the causal link between *cis*-regulatory properties of TEs and established expression patterns of nearby genes, requires loss-of-function experiments and has rarely been demonstrated (Chuong *et al*, 2016).

TE *cis*-regulatory effects can either be genetic in nature, such as when the TE contains regulatory motifs, or epigenetic through recruitment of dimethylation of histone 3 lysine 9 (H3K9m2) and cytosine DNA methylation, which are hallmarks of transposon control. DNA methylation in Arabidopsis is carried out by four pathways. While METHYLTRANSFERASE1 (MET1) (Kankel *et al*, 2003) maintains CG methylation, CHROMOMETHYLASE2 and 3 (CMT2 and CMT3) maintain CHG methylation (where H is any base pair but not a G) (Zemach *et al*, 2013; Stroud *et al*, 2014). The maintenance of CHH methylation requires either CMT2 for long heterochromatic repeats or RNA-directed DNA methylation (RdDM) mediated by DOMAINS REARRANGED METHYLASE 2 (DRM2) and accompanying small RNA machinery (Cao & Jacobsen, 2002; Chan, 2004; Deleris *et al*, 2016). In addition, the SNF2 family chromatin remodeler DECREASED DNA METHYLATION 1 (DDM1) is necessary for heterochromatic DNA methylation in all cytosine sequence contexts (Jeddeloh *et al*, 1999; Zemach *et al*, 2013). Furthermore, DNA methylation and H3K9m2 are mechanistically interconnected and, as a result, are largely co-localized throughout the genome (Du *et al*, 2015). Importantly, this histone and cytosine marking can also impact the nearby genes which then become epigenetically controlled because of the inhibitory effect of DNA and H3K9 methylation on promoter activity (Lippman *et al*, 2004; Liu *et al*, 2004; Huettel *et al*, 2006; Gehring *et al*, 2009). In addition, in both plants (Mathieu *et al*, 2005; Deleris *et al*, 2012; Weinhofer *et al*, 2010) and animals (Reddington *et al*, 2013; Saksouk *et al*, 2014; Basenko *et al*, 2015; Walter *et al*, 2016), the removal of DNA methylation at some TEs leads to H3K27 trimethylation (H3K27m3), an epigenetic mark deposited and interpreted by Polycomb Group (PcG) proteins, which normally target and silence protein coding genes that are often

developmentally important (Förderer *et al*, 2016). Thus, there exists a potential for this alternative repression system to mediate silencing of TEs, but it has not been fully explored in plants, except in the endosperm, a nutritive and terminal seed tissue that is naturally DNA hypomethylated (Weinhofer *et al*, 2010; Moreno-Romero *et al*, 2016).

In accordance with the epigenetic control mediated by DNA and histone H3K9 methylation, mutations in DNA methylation pathway genes lead to reactivation of various subsets of TEs; however, these defects in chromatin regulation are not always sufficient for TE expression, and the activation of specific signaling pathways is sometimes needed. This has been exemplified by the Arabidopsis Long-Terminal Repeats (LTR)-retrotransposon *ONSEN*, which was shown to be reactivated after heat-stress, in wild-type plants and independently from a loss of DNA methylation in this context (Ito *et al*, 2011; Cavrak *et al*, 2014). In addition, *ONSEN* was not expressed in unstressed RdDM-defective mutants (nor in *ddm1*), but its induction was enhanced in RdDM-defective mutants subjected to heat stress (Ito *et al*, 2011). To our knowledge, *ONSEN* is the only described example of a TE which expression is modulated by DNA methylation during stress response. Thus, it is important to characterize other TEs that exploit plant signaling, in order to gain a deeper understanding of the connection between biotic/abiotic stresses and transposon activation, and how epigenetic silencing pathways exert their influence on this relationship.

In this study, we unravel the responsiveness of another family of Arabidopsis retroelements, *ATCOPIA93* (Mirouze *et al*, 2009; Marí-Ordóñez *et al*, 2013), during PAMP-triggered immunity (PTI). PTI is defined as the first layer of active defense against pathogens and relies on the perception of evolutionary conserved Microbe- or Pathogen-associated molecular patterns (MAMPs or PAMPs) by surface receptors (Boutrot & Zipfel, 2017). *ATCOPIA93* is a low-copy, evolutionary young family of LTR-retroelements, which is tightly controlled by DNA methylation, in particular CG methylation (Mirouze *et al*, 2009). The family representative *EVD* (*AT5G17125*) was found to transpose in *ddm1* after eight generations of inbreeding (Tsukahara *et al*, 2009) as well as in genetically wild-type epigenetic recombinant lines (epiRILs) derived from crosses between wild-type and *met1* (Mirouze *et al*, 2009, Marí-Ordóñez *et al*, 2013) or *ddm1* (Marí-Ordóñez *et al*, 2013). *EVD* is 99.5% identical in sequence to the pericentromeric *ATR* (*AT1G34967*), which is predicted to encode a polyprotein but does not seem to be active in the latter conditions (Mirouze *et al*, 2009). Here, we first took advantage of an unmethylated *ATCOPIA93* LTR-*GUS* fusion that we used as a reporter of promoter activity, since LTRs of retroelements contain *cis*-regulatory sequences that can recruit RNA Pol II (Chuong *et al*, 2016). We showed that this LTR exhibits the hallmarks of a promoter of

an immune-responsive gene in the absence of epigenetic control. Accordingly, the corresponding methylated endogenous *ATCOPIA93* retroelements, *EVD* and *ATR*, were only significantly reactivated after PAMP-elicitation in a DNA hypomethylated background, in *met1* or *ddm1* mutants. Interestingly, we demonstrated for the first time in wild-type plant vegetative tissues, a second layer of control of TE expression mediated by Polycomb silencing. Importantly, we showed that H3K27m3 co-exists with DNA methylation at *EVD* sequences but not at *ATR*, leading to a differential negative control between these two copies during immunity. Furthermore, we were able to test the implications of these findings for the regulation of the immune response. We identified an *ATCOPIA93*-derived soloLTR, unmethylated and not marked by H3K27m3, upstream of the *RPP4* disease resistance gene. By measuring the impact of the genetic loss of this soloLTR, we could show that it has been co-opted for the proper expression of *RPP4* during PAMP-triggered plant basal defense and thus that it plays a role as regulatory “enhancer” element. Thus, we established a link between the responsiveness of a TE to biotic stresses and the co-option of its derived soloLTR for plant immunity, where the repressive epigenetic modifications controlling the full-length active elements are absent on the derived regulatory sequence.

## **Results**

### ***ATCOPIA93*-LTR::*GUS* transcriptional fusion behaves as a canonical immune-responsive gene.**

An *ATCOPIA93*-LTR::*GUS* construct –comprising the full *EVD/ATR* LTR upstream of a sequence encoding a GUS protein (schema Fig 1A, EV1A) – was transformed into the *Arabidopsis* wild type reference accession Columbia (Col-0), initially to serve as a reporter of DNA methylation levels. Unexpectedly, the LTR::*GUS* transgenes were not methylated in any of the transgenic lines obtained (Fig 1A, Fig EV1B). Instead, we generated a reporter of *ATCOPIA93* promoter activity that we could exploit to assess *ATCOPIA93* responsiveness during PTI in the absence of DNA methylation-mediated control. Plants containing the LTR::*GUS* transcriptional fusion were further elicited with either flg22 (a synthetic peptide corresponding to the conserved N-terminal region of bacterial flagellin that is often used as a PAMP surrogate) (Zipfel *et al*, 2004; Boutrot & Zipfel, 2017), or *Pto*Δ28E (a non-pathogenic *Pseudomonas syringae* pv. *tomato* DC3000 (*Pto* DC3000) in which 28 out of 36 effectors are deleted (Cunnac *et al*, 2011)), and the accumulation of *GUS* mRNA and protein was monitored

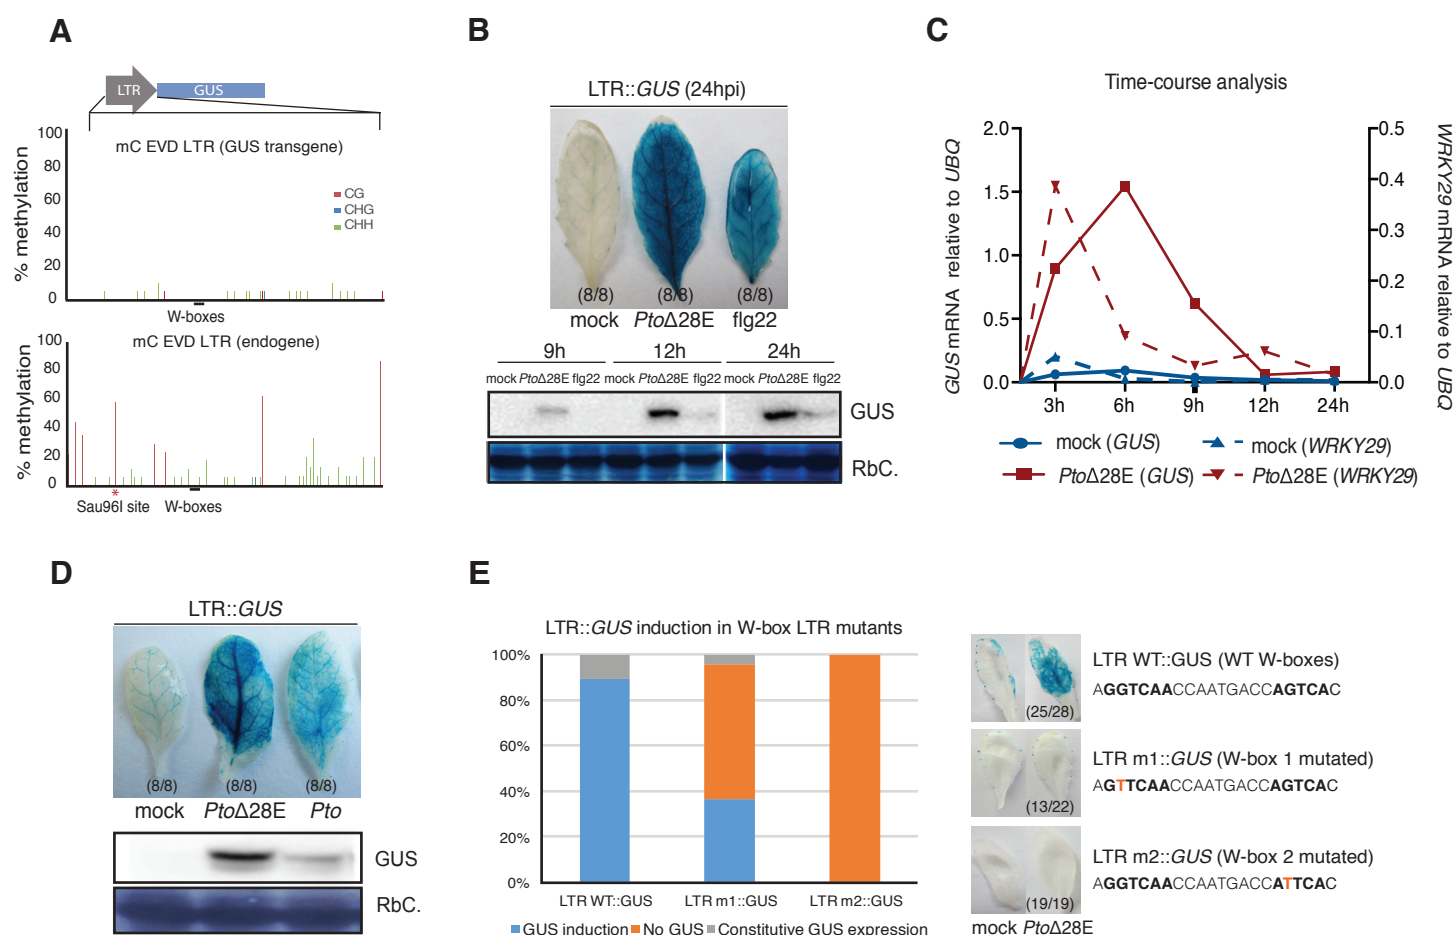

**Figure 1. *ATCOPIA93* LTR::GUS transcriptional fusion behaves like a canonical immune responsive gene.**

**A.** Cytosine methylation analyzed by bisulfite-sequencing at the LTR::GUS transgene. Genomic DNA of a pool of LTR::GUS transgenic plants (one T3 line, four plants, two rosette leaves each) was treated with sodium bisulfite, amplified with primers specific for the LTR contained in the LTR::GUS construct and cloned for sequencing (19 clones). The endogenous LTR of *ATCOPIA93* EVD was sequenced as a positive control (17 clones). The percentage of methylated cytosines is indicated by vertical bars. This result was also reproduced in various T3 and T1 lines by a Sau961 methylation-sensitive assay analyzing the first CG site (red asterisk)(Fig EV1B).

**B.** Accumulation of GUS protein detected in response to bacterial elicitors of basal immunity. Upper panel: representative pictures of leaves infiltrated with water (mock), *Pto* DC3000 deleted of 28 effectors (*Pto*Δ28E) at 2.10<sup>8</sup> colony-forming unit per ml (cfu/ml) or 1 μM of flg22, and incubated with GUS substrate 24 hours post-infiltration (24hpi). The number of leaves showing this representative phenotype is shown into brackets. Lower panel: Western blot analysis over a 24h time-course; RbC: Rubisco. Three to four plants (two leaves per plant) were infiltrated for each condition and time point, and leaves pooled by condition and time-point before extracting the proteins. Samples derived from the same experiment, and gels and blots were processed in parallel. This experiment was repeated twice with similar results.

**C.** Time-course analysis of GUS mRNA (plain lines) and PTI-marker WRKY29 mRNA (dashed lines) by RT-qPCR. Leaves were infiltrated with water (mock), or effectorless bacteria *Pto* DC3000 (*Pto*Δ28E) at 2.10<sup>8</sup> cfu/ml; two similar leaves of three to four plants were pooled by condition and by time-point after infiltration (as in B) before extracting the RNA subjected to RT-qPCR. Values are relative to the expression of the *UBIQUITIN* gene (*At2g36060*). This experiment was repeated twice independently and another independent experiment is shown in Fig EV1C.

**D.** Accumulation of GUS protein detected in response to virulent bacteria *Pto* DC3000 versus *Pto*Δ28E. Upper panel: representative pictures of leaves infiltrated with water (mock), effectorless (*Pto*Δ28E) and virulent (*Pto*) bacteria *Pto* DC3000, both at 1.10<sup>7</sup> cfu/ml, and incubated with GUS substrate at 24hpi. The number of leaves showing this representative phenotype is shown into brackets. Lower panel: Western blot analysis of the GUS protein accumulated at 24hpi; RbC: Rubisco. Two similar leaves of three to four plants were pooled by condition and time-point before extracting the proteins.

**E.** Activation of the GUS expression upon *Pto*Δ28E elicitation in LTR::GUS plants with mutated W-boxes. Experiments were performed on 28, 22, and 19 primary transformants for the LTR::GUS WT, m1 and m2 constructs respectively; the point-mutations introduced are depicted on the right (W-boxes are the sequences in bold). Mock and *Pto*Δ28E (at 2.10<sup>8</sup> cfu) treatments were performed on four similar leaves of each individual transformant and GUS staining performed 24 hours later on two leaves. One representative picture (into brackets is the number of plants showing this phenotype) for one primary transformant is shown for each construct with each treatment. Plants were classified into three categories: normal GUS induction, loss of GUS induction, constitutive GUS expression and percentages of plants belonging to each category over the total number of plants tested were calculated.



over a 24 hour time course. In water-treated plants, at 24 hours post-infiltration (hpi), there was barely any GUS staining, indicating that the activity of the *ATCOPIA93* LTR promoter is weak in this condition. By contrast, in both flg22 and *Pto*Δ28E treatments, an intense GUS staining was observed at 24 hpi (Fig 1B, top panel). This was associated with progressive GUS protein accumulation over the time-course, until it reaches a plateau (Fig 1B, bottom panel). At all the time points analyzed, the *GUS* expression was generally stronger in response to *Pto*Δ28E than flg22 and thus we focused on the former bacterial elicitor for the rest of the study. By analyzing *GUS* mRNA levels, we could then show that the *GUS* induction was transient, similarly as an immune-responsive gene induced rapidly during PTI such as *WRKY29* (Asai et al., 2002) (Fig 1C, Fig EV1C). In addition, treatment with the virulent wild-type *Pto* DC3000 strain, which can inject type III effectors into the host cell, resulted in a partially compromised induction of GUS protein accumulation compared to a similar inoculum of *Pto*Δ28E (Fig 1D), suggesting that some bacterial effectors suppress the *LTR* responsiveness during PTI. This transcriptional behavior is reminiscent of typical PTI-induced genes whose induction is impaired by bacterial effectors that have evolved to suppress different steps of PTI to enable disease (Asai & Shirasu, 2015). Together, these data show that the *ATCOPIA93* LTR::*GUS* transgene behaves like a canonical immune-responsive gene, which is transcriptionally reactivated during PTI and whose induction is suppressed by bacterial effectors. In support of this, we noticed in the LTR sequence the presence of two putative W-box elements, i.e. DNA sequences with the C/TTGACC/T (A/GGTCAA/G) motif, which are the cognate binding sites for WRKY transcription factors that are known to orchestrate transcriptional reprogramming during PTI (Rushton *et al*, 2010) (Fig EV1A). Importantly, we found that these two putative W-box elements are functional as the *Pto*Δ28E-mediated transcriptional induction of *GUS* was lost in part or entirely when W-box 1 and W-box 2 were mutated, respectively (Fig 1E).

### ***AtCOPIA93* reactivation is negatively controlled by DNA methylation during PAMP-triggered immunity.**

We next analyzed, over the same period of time, the reactivation of the almost identical endogenous copies of *AtCOPIA93*: *EVD* and *ATR*. The induction of their expression upon bacterial challenge was generally weak in wild-type leaves (Fig 2A and 2B, Fig EV2). By contrast, we observed a consistent and transient induction of *EVD/ATR* at 3, 6 and 9 hpi in a *ddm1* hypomethylated background (Stroud et al, 2013, Fig 2A and 2B left panel, Fig EV2), specifically in response to the *Pto*Δ28E strain. *EVD/ATR* transcript levels were also enhanced at 6 hpi in a bacteria-challenged *met1* mutant (Fig 2B, right panel), which is impaired in CG

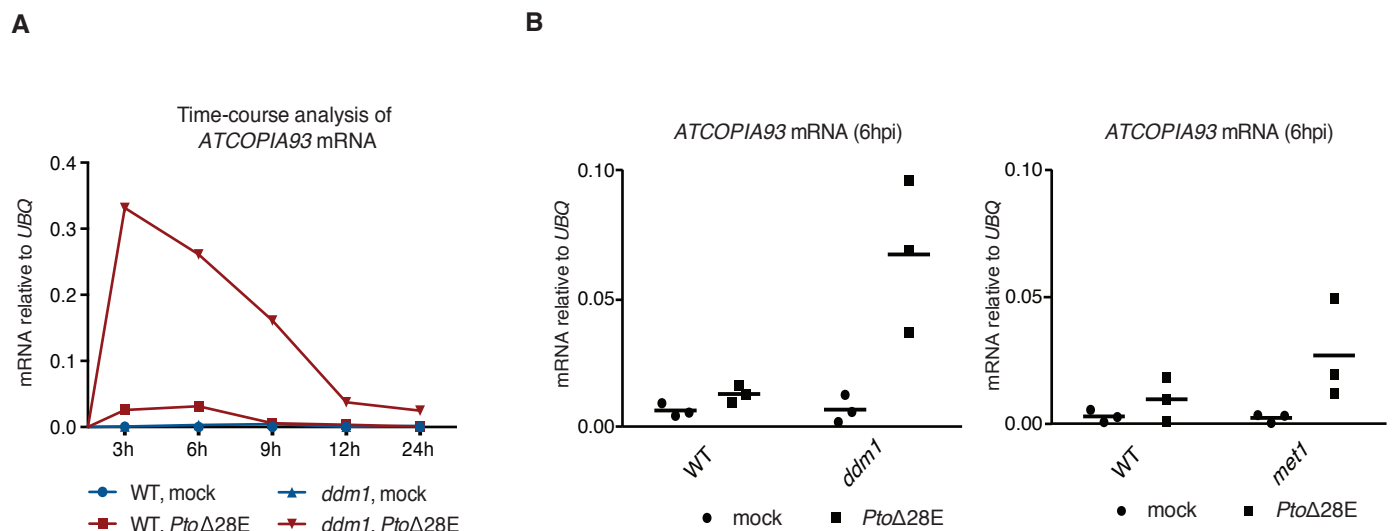

**Figure 2. *ATCOPIA93* reactivation is negatively controlled by DNA methylation.**

**A.** Time course analysis of *ATCOPIA93* mRNA by RT-qPCR. Leaves were infiltrated with water (mock), or *Pto*Δ28E bacteria at  $2.10^8$  cfu/ml; two similar leaves of three to four plants were pooled by condition and by time-point after infiltration before extracting the RNA. Values were determined by RT-qPCR and are relative to the expression of the *UBIQUITIN* gene (*At2g36060*). This experiment was repeated twice with similar results and another independent experiment is shown in Fig EV2.

**B.** *ATCOPIA93* mRNA analysis in two methylation-defective mutants, *ddm1* and *met1*, at 6 hours post-treatment with either water or *Pto*Δ28E at  $2.10^8$  cfu/ml. Material and data were generated as in A. The data points for three independent experiments are plotted.

methylation (Ordonnez et al., 2013). Together, these data indicate a tight negative control of *ATCOPIA93* induction which is exerted by DNA methylation and is particularly relevant during bacterial challenge when the LTR is activated. Notably, at this developmental stage, mutations in the components of the DNA methylation pathways were not sufficient to enhance *ATCOPIA93* expression in the absence of bacterial stress, in accordance with the transcriptional behavior of the unmethylated LTR::*GUS* fusion which displays weak promoter activity in water-treated plants (Fig 1).

### ***ATCOPIA93-EVD* is marked by H3K27m3 chromatin modification in addition to DNA methylation.**

Given previous observations in plants and mammals that some loci gain H3K27m3 marks upon their loss of DNA methylation (Mathieu *et al*, 2005; Deleris *et al*, 2012; Weinhofer *et al*, 2010; Reddington *et al*, 2013; Saksouk *et al*, 2014; Basenko *et al*, 2015), presumably mediating “back-up” transcriptional silencing of hypomethylated sequences, we thought that there could be an increase in H3K27m3 marks at *ATCOPIA93*-LTR in *ddm1* plants. To test this possibility, we inspected publically available ChIP-chip datasets and found that *ATCOPIA93* is marked by H3K27m3, not only in an hypomethylated mutant *met1*, but also unexpectedly in wild-type plants (Fig 3A). However, one limit of ChIP-chip and ChIP-seq datasets is that they do not allow precise determination of the genomic localization of immunoprecipitated repeated sequences, either because of cross-hybridization (ChIP-chip) or the impossibility to accurately map multiple repeated reads (ChIP-seq). To circumvent this problem, we designed specific qPCR primers to discriminate *EVD-LTR* from *ATR-LTR* sequences after ChIP by using upstream genomic sequences. In addition, we took advantage of the rare SNPs between *EVD* and *ATR* and used pyrosequencing to analyze the immunoprecipitated fragments from the *ATCOPIA93* coding sequence (CDS), where specific primer design is impossible. Interestingly, with both these approaches, we found that there was a strong bias towards *EVD* molecules in the H3K27m3-IPs (Fig 3B, Fig EV3A and Fig 3C, Fig EV3B). This could be possibly due to a positional effect, as the *EVD* sequence is embedded in a larger domain of H3K27m3 that comprises seven adjacent genes (Fig 3A) (*At5g17080* to *At5g17140*, coding for either cysteine-proteinases or cystatin-domain proteins). Nevertheless, there was less H3K27m3 in the CDS than in the LTR region (Fig 3B, Fig EV3A); this likely reflects the previously observed antagonism of DNA methylation/H3K9m2 and H3K27m3 (Mathieu *et al*, 2005; Deleris *et al*, 2012; Weinhofer *et al*, 2010) since DNA/H3K9 methylation levels are higher in the coding sequence of *EVD* than in the LTR (Fig EV3C)(Marí-Ordóñez *et al*, 2013). Finally, we found



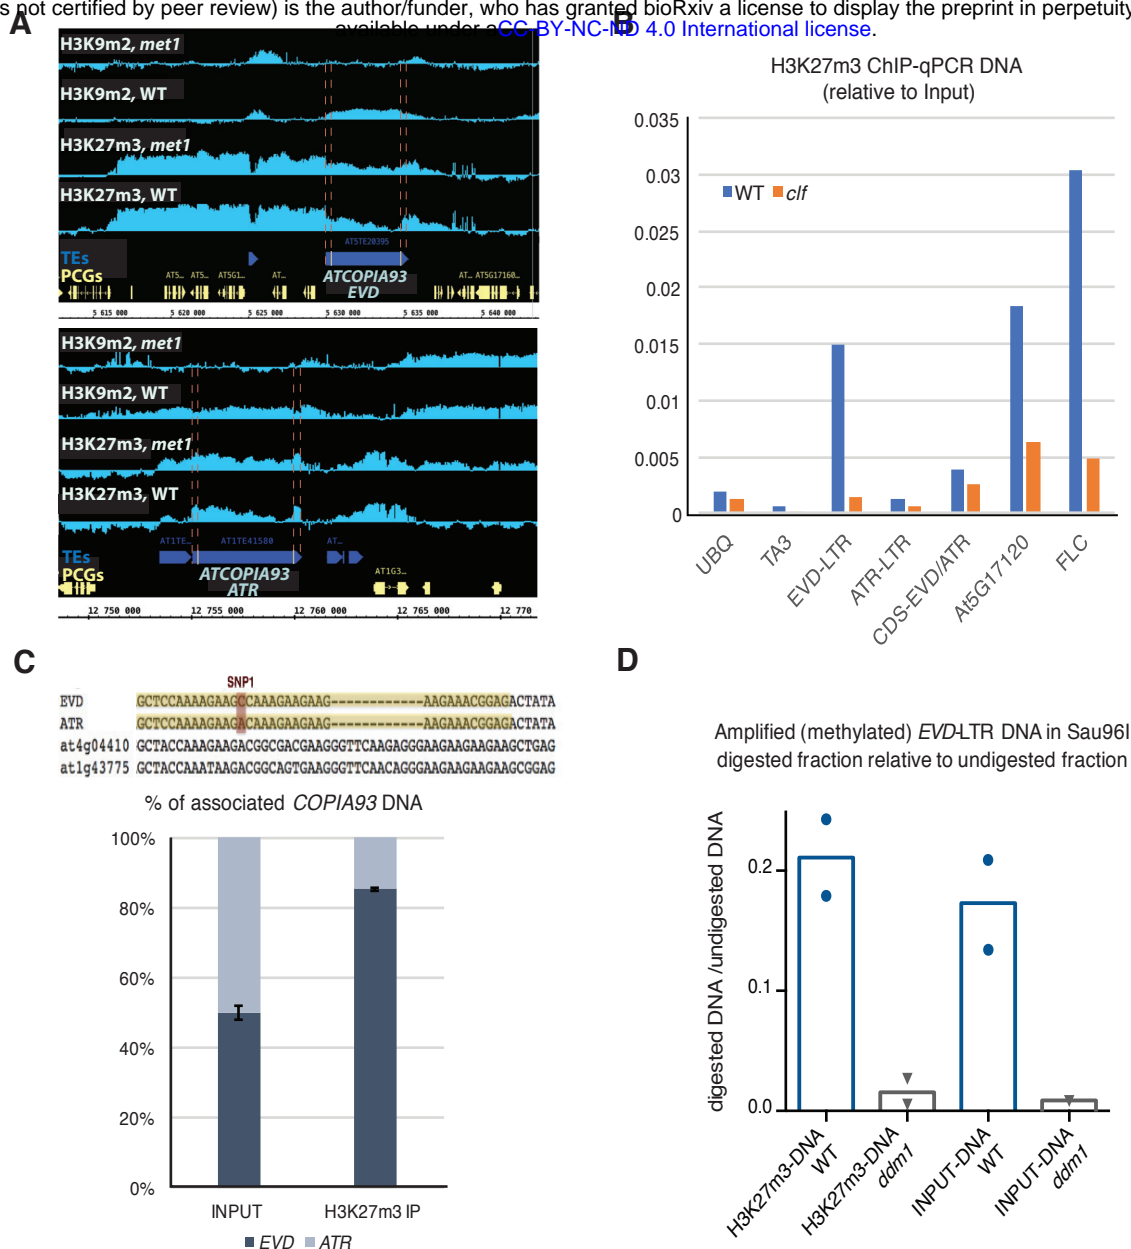

**Figure 3. H3K27m3 and DNA methylation coexist at *ATCOPIA93***

**A.** IGB (Integrative Genome Browser) views showing H3K9m2 levels and H3K27m3 levels in WT and *met1* rosette leaves, at *ATCOPIA93* EVD and ATR (ChIP-chip public data, Deleris *et al.*, 2012). Yellow horizontal bars: protein-coding genes; horizontal blue bars: transposable elements. The LTRs are delineated by pink bars. Vertical light blue bars: H3K9m2 signal relative to H3 (two top lanes) and H3K27m3 signal relative to H3 for each probe.

**B.** Analysis of H3K27m3 marks at *ATCOPIA93* EVD and ATR by ChIP on rosette leaves, followed by qPCR, in wild-type plants and in *clf* plants mutated for the H3K27 methylase CURLY LEAF. Data were normalized to the input DNA. *ATCOPIA93* CDS is a region in *ATCOPIA93* GAG common to EVD and ATR. *At5g17120* is a region in the protein-coding gene located upstream of EVD. *FLC* is a region located in the first intron of *FLOWERING LOCUS C* which shows high levels of H3K27m3 in vegetative tissues and serves as a positive control. *TA3* is a transposon and serves as a negative control. Because of technical variability in the ChIP efficiency, one ChIP experiment is presented here and two other independent experiments are presented in Figure EV3. ChIPs were performed on a pool of rosette leaves from eight to ten plants/genotype.

**C.** Genomic distribution of H3K27m3 marks between EVD and ATR loci by ChIP-PCR pyrosequencing. Upper panel: depiction of the pyrosequenced region (in yellow) within the GAG biotinylated qPCR amplicon obtained after H3K27m3 ChIP-qPCR and purification with streptavidin beads. The position interrogated corresponds to the discriminating SNP between EVD (A/T) and ATR (C/G). The % indicated represents the % of T (EVD, in black bar) or G (ATR, grey bar) at that position. The sequencing primer was designed so that other *ATCOPIA93*-derived sequences (divergent and non functional) such as *At4G04410* and *At1G43775* cannot be amplified and so that the allelic ratio between the two active *ATCOPIA93* copies EVD and ATR only can be evaluated. To verify this, the qPCR GAG product is also amplified from the Input gDNA as a control where a 50%-50% ratio is expected. For clarity, an average of two experiments performed on two independent Input and ChIPs samples is shown and individual datasets presented in Figure EV3B.

**D.** Methylation status of the DNA captured with H3K27m3 by Sau96I Chop-qPCR. H3K27m3 ChIP-DNA from two independent ChIPs was digested with the methylation-sensitive restriction endonuclease Sau96I which is sensitive to the methylation of the second C at the GGGCCG site in the LTR (as in Fig EV1) in two independent. Digested DNA was quantified by using qPCR with primers specific for a region of EVD *ATCOPIA93* LTR spanning this Sau96I restriction site, and the signal was normalized to an undigested control. The values from two independent experiments are plotted showing that the WT ChIP-DNA had significantly less digestion compared with the *ddm1* control, thus there was more methylation.

that H3K27m3 levels were strongly reduced in *clf* plants mutated for the Polycomb-Repressive Complex 2 (PRC2) H3K27 methylase CURLY LEAF (Förderer *et al*, 2016)(Fig 3B).

Next, we assessed whether H3K27m3 and DNA methylation could co-exist on the same molecules or whether the detection of both marks in wild type rosette leaves was only reflecting the contribution of different cell types, some marked by H3K27m3 at *EVD* and some by DNA methylation. To distinguish between these two possibilities, we analyzed the DNA methylation status of one representative CG site at the LTR region of *EVD* using a methylation sensitive enzyme assay on H3K27m3-IPed DNA, followed by qPCR (Fig EV1B, bottom panel). We observed amplification of the enzyme-treated DNA, comparable to the total input genomic DNA (Fig 3D). Based on this result we can conclude that the *EVD* DNA associated with H3K27m3 is methylated and that DNA methylation does not inhibit H3K27m3 deposition in this region.

### **Polycomb-group proteins and DNA methylation exert differential negative control on *ATCOPIA93* induction during PAMP-triggered immunity.**

The co-existence of DNA methylation and H3K27m3 at *EVD*-LTR suggests that there is dual control by both PcG- and DNA methylation- mediated silencing on the same molecule, in the same cell type. To test for the functional relevance of PcG silencing at *ATCOPIA93-EVD*, we challenged wild-type and *clf* mutant plants with *Pto*Δ28E and monitored *ATCOPIA93* transcript levels by RT-qPCR analyses, using *ddm1* mutant plants as a positive control. Results from these analyses revealed a variable but consistent reactivation of *ATCOPIA93* expression in bacteria-elicited *clf* plants, though generally weaker than in elicited *ddm1* plants (Fig 4A and 4B). These data indicate that both DNA methylation and PcG negatively regulate the transcriptional activation of *ATCOPIA93* during plant defense. Furthermore, by pyrosequencing *ATCOPIA93* cDNA in bacteria-elicited plants, we observed that while both *EVD* and *ATR* are induced in *ddm1*, *EVD* almost exclusively is reactivated in *clf*-elicited mutant background (Fig 4C, Fig EV4A). This is consistent with *EVD* exhibiting comparatively stronger H3K27m3 enrichment than *ATR* in wild-type (Fig 3). The pyrosequencing result also presumably explains, at least partly, the weaker *ATCOPIA93* induction observed in *clf* compared to *ddm1* after bacterial challenge (Fig 4A, 4B), as the mRNA is almost only contributed by *EVD* in *clf* (Fig 4C). In addition, as anticipated, we observed that in *clf* mutants, where H3K27m3 is reduced, H3K9m2 marks were retained to levels comparable to WT at *EVD* (Fig EV4B, top panel); this likely contributes to explain lower accumulation of *EVD* transcripts in *clf* than *ddm1* (Fig 4D). In *ddm1* mutants, where H3K9m2 is reduced, H3K27m3 marks were

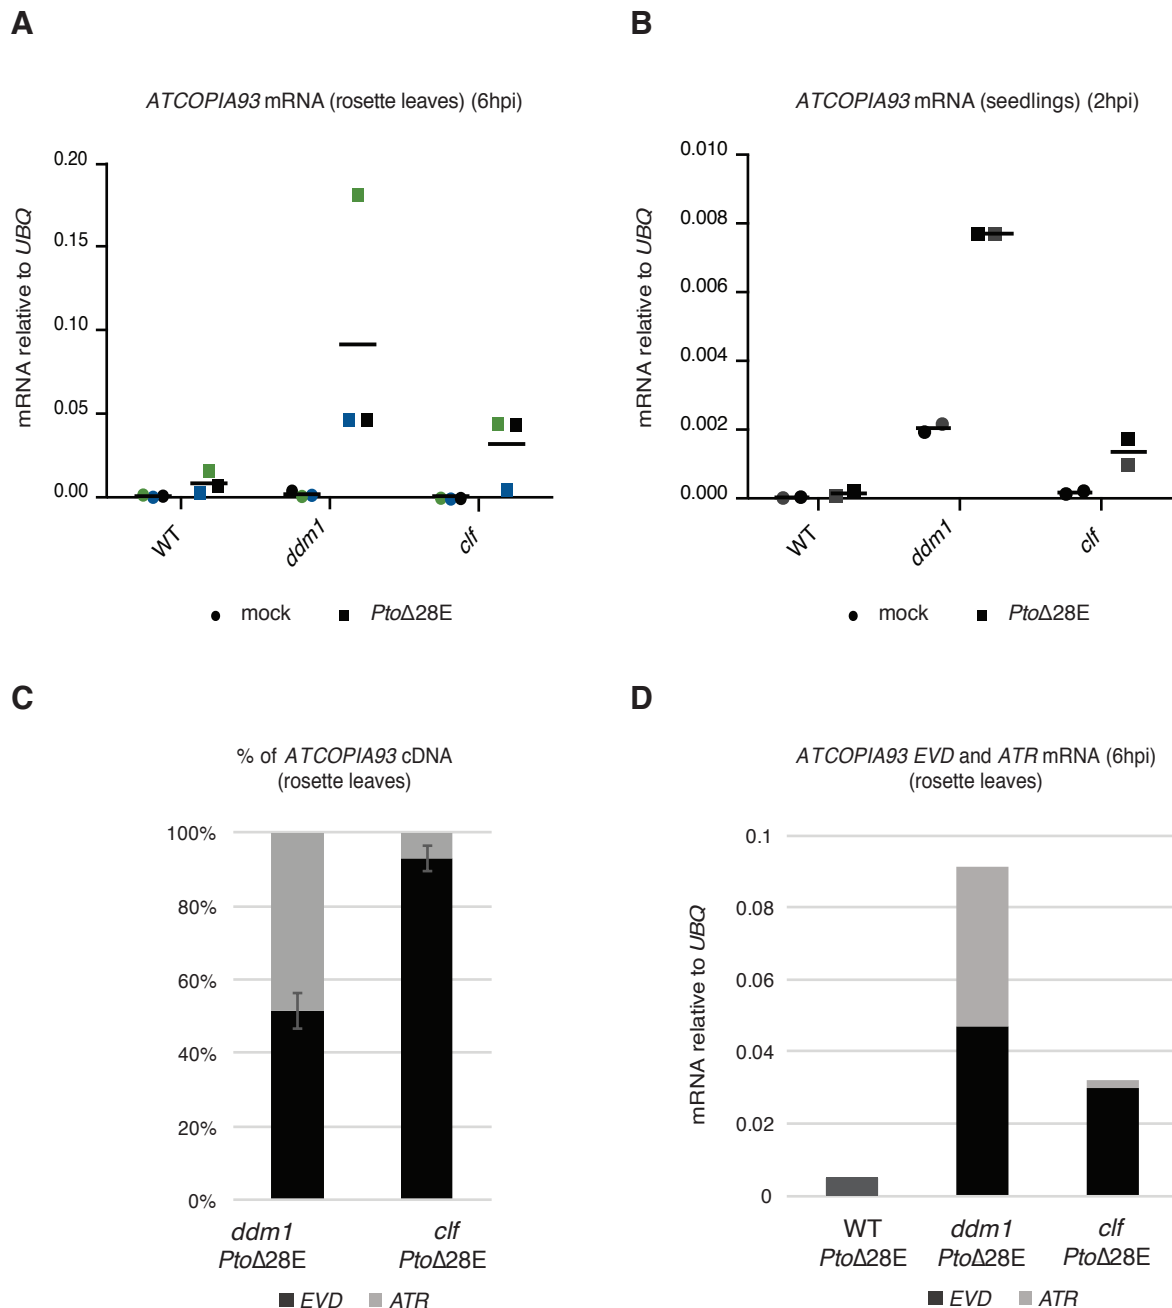

**Figure 4. PcG-mediated silencing and DNA methylation exert differential negative control on the induction of *ATCOPIA93*-EVD and ATR during PAMP-triggered immunity.**

**A.** *ATCOPIA93* mRNA levels in pools of rosette leaves of DNA methylation mutant *ddm1* and PRC2 mutant *clf* (three to four plants per condition), 6 hours post-infiltration with either water or *PtoΔ28E* bacteria at  $2.10^8$  cfu/ml. Values were determined by RT-qPCR and are relative to the expression of the *UBIQUITIN* (*At2g36060*) gene. Three independent experiments were performed and the three corresponding biological replicates are shown and represented by black, blue and green symbols respectively. The average is represented by a black horizontal bar.

**B.** *ATCOPIA93* mRNA levels in seedlings of *ddm1* and *clf* mutants. About thirty to forty of three week-old seedlings (grown in plates then transferred to liquid medium) were vacuum-infiltrated with either water or a suspension of *PtoΔ28E* bacteria at  $2.10^8$  cfu/ml and collected two hours later (this time-point was determined on the basis of LTR::GUS expression in a pilote experiment). Less variability is observed at this stage as shown by the two biological replicates (black and grey symbols).

**C.** Qualitative analysis by pyrosequencing of the RT-qPCR products quantified in 4A. The pyrosequenced region and SNP interrogated are the same as in Fig 3. For clarity, the average of three experiments on the three biological replicates (4A) is shown; the independent replicates are shown individually in Figure EV4 with the corresponding color code.

**D.** Determination of EVD and ATR transcripts levels 6hpi with *PtoΔ28E* by integrating *ATCOPIA93* total transcript levels (4A) with pyrosequencing data. Calculations were made by applying the average respective ratios of EVD and ATR (4C) to the average RNA values (relative to *UBIQUITIN*) of the three biological replicates shown in 4A. Pyrosequencing could not be performed in wild type because of too low amount of *ATCOPIA93* transcript thus the EVD/ATR ratio could not be determined and an intermediate grey color is used.

also retained to levels comparable to WT at *EVD* (Fig EV4B, lower panel) suggesting that H3K9m2/DNA methylation may exert a stronger repressive effect on *EVD* than polycomb group proteins.

### ***Cis*-regulation of the *RPP4* disease resistance gene by a *ATCOPIA93*-derived, unmethylated soloLTR**

The corollary of our findings on *ATCOPIA93* regulation is that the presence of a *ATCOPIA93* LTR in the genome, if deprived of DNA methylation and H3K27m3, can potentially lead to the transcription of downstream sequences, thus potentially affecting the transcription of adjacent genes. We found through a BLAST search, three new *ATCOPIA93*-derived sequences in the genome on the chromosome 3, in addition to the ones that were previously annotated on chromosomes 1, 3 and 4. Interestingly, apart from two copies on chromosomes 1 and 4, all other five sequences are present in the form of a soloLTR, which is the product of unequal recombination between the LTRs at the ends of a single retroelement (Fig EV5A). The functional W-box 1 was conserved in all of them making them potentially regulatory units responsive to PAMP-triggered immunity (Fig EV5). Interestingly, detection of transcription was detected in response to various bacterial challenges downstream of soloLTR-1, soloLTR-2 and soloLTR-5 (Fig EV5A). While soloLTR-1 and -2 are located upstream of a pseudogene and an intergenic region respectively, both of unknown function, the soloLTR-5 is embedded in the predicted promoter of the *RECOGNITION OF PERONOSPORA PARASITICA 4 (RPP4)* gene, less than 500 bp upstream of the annotated transcriptional start site. *RPP4* is a canonical and functional disease resistance gene that belongs to the *RPP5* cluster on chromosome 4, which is composed of 7 other Toll Interleukin-1 Receptor (TIR) domain-Nucleotide binding site (NBS) and Leucine-rich repeat (LRR) domain (TIR-NBS-LRR genes) (Noel, 1999). Among these genes, *RPP4* was previously shown to confer race-specific resistance against the oomycete *Hyaloperonospora arabidopsidis* isolates Emwa1 and Emoy2 (Van Der Biezen *et al*, 2002). In addition, we observed that *RPP4* was generally induced during PTI, either triggered by *Pto*Δ28E (Fig EV5B) or by various bacterial and oomycete PAMPs tested at 4 hpi (<https://bar.utoronto.ca/eplant/> AT4G16860, Tissue and Experiment eFP viewers, Biotic Stress Elicitors, Waese *et al.*, 2017). Interestingly, the soloLTR-5 is completely DNA unmethylated and not marked by H3K27m3 nor H3K9m2 (Fig 5A, Ordonnez *et al.*, 2013).

To test whether the presence of this presumably PAMP-responsive *ATCOPIA93*-soloLTR has a *bona fide* impact on the expression of *RPP4* during PTI and could be co-opted for regulatory functions, we took a loss-of-function approach. We transformed *rrp4* knock-out (KO) mutants with transgenes consisting of the entire *RPP4* genomic region under the control of its native promoter (~3kb upstream of the TSS, comprising the whole upstream gene unit) or under the control of the same promoter sequence with a deletion for soloLTR-5 (Fig 5B, “WT” and “ΔLTR” constructs). We further analyzed the primary transformants for *RPP4* expression in response to either water or *Pto*Δ28E treatments. In the absence of the soloLTR-5, *RPP4* expression was reduced in both mock-inoculated (Fig 5C, significant decrease between the blue boxplots) and *Pto*Δ28E-elicited plants (Fig 5C, significant decrease between the red boxplots); in addition, the induction of *RPP4* expression upon bacterial elicitation was no longer significant in the absence of the soloLTR-5 (Fig 5C). These results provide evidence that the *ATCOPIA93*-derived LTR is required for both the basal expression and bacterial-stress induction of *RPP4*. In addition, to assess whether soloLTR-5 contributes to *RPP4* induction during *Pto*Δ28E elicitation through the conserved W-box1 (Fig EV5C), which had a partial effect on the induction of the LTR::*GUS* fusion (Fig 1E), we transformed the *rrp4* KO mutant plants with a construct comprised of the *RPP4* gene under the control of its promoter mutated in the W-box 1 element (Fig 5B, “w1” construct). We found that *RPP4* expression levels in the absence of *Pto*Δ28E-challenge were globally unchanged when the W-box element was mutated (Fig 5D, not significant between the blue boxplots). However, the induction of *RPP4* expression was significantly reduced in transgenic plants containing the “w1” mutant version *versus* plants containing the “WT” transgene upon bacterial challenge (Fig 5D, significant decrease between the red boxplots) and induction no longer occurred in these “w1” transgenic plants (not significant between mock-treated and bacteria-treated “w1” plants). These results demonstrate that the LTR responsiveness to bacterial PAMPs contributes to proper induction of *RPP4* and is mediated at least in part by a functional W-box element.

Finally, to assess the relevance of this layer of regulation of *RPP4* during immune responses against *H. arabidopsidis* (to which *RPP4* confers race-specific resistance), we treated LTR::*GUS* plants with NLP20, the active peptide of the oomycete PAMP NPP1 that was previously shown to be non-cytotoxic *in planta* (Oome *et al*, 2014). We found that the LTR::*GUS* fusion was similarly responsive to this oomycete PAMP (Fig 5E), showing that NLP20 induces the same *ATCOPIA93*-LTR regulation as *Pto*Δ28E, in accordance with the fact that the PTI responses induced by unrelated PAMPs largely overlap (Katagiri, 2004; Schwessinger & Zipfel, 2008; Zipfel *et al*, 2006).

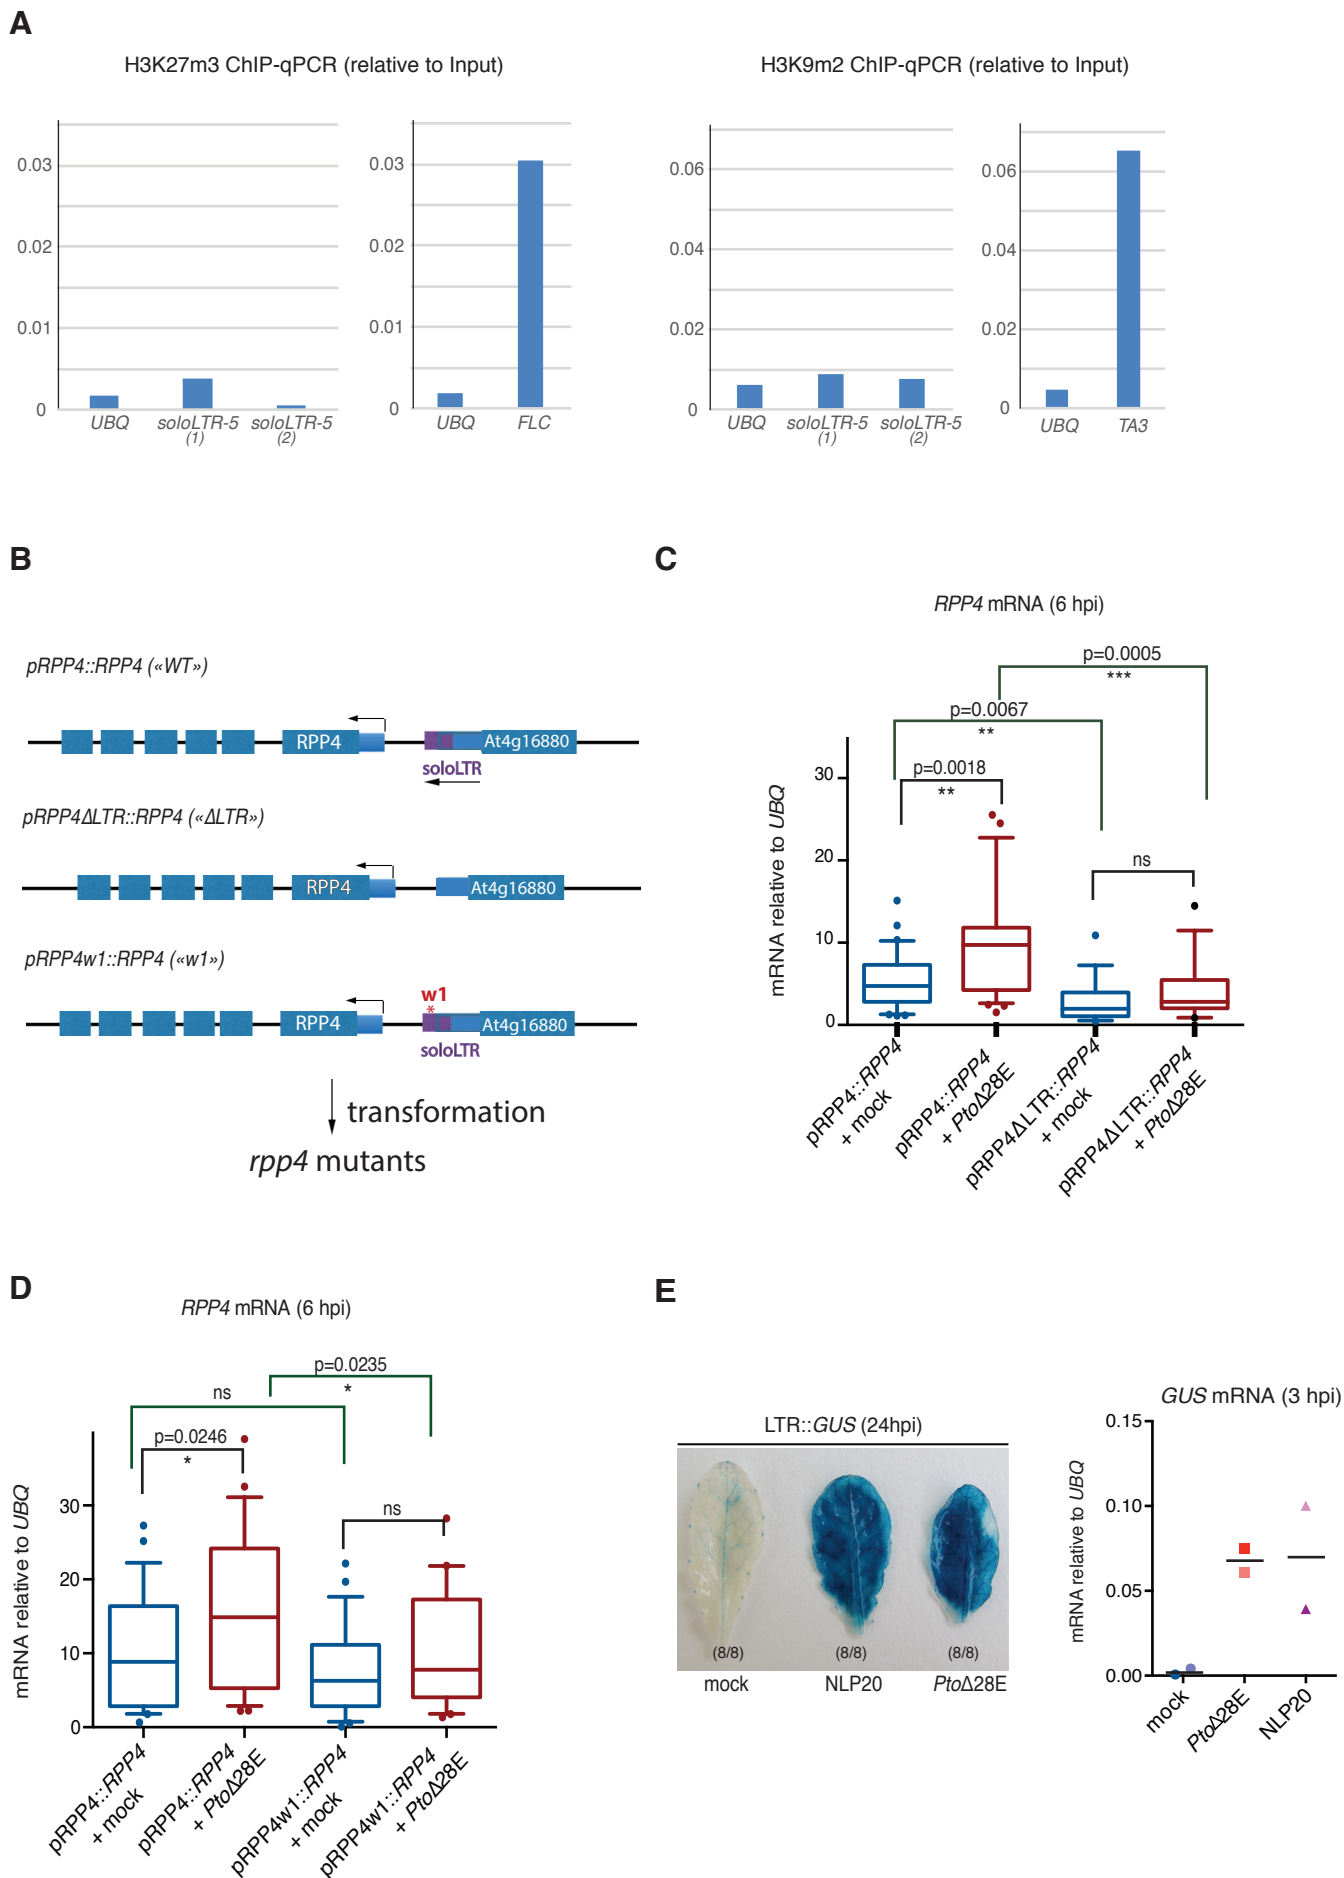



# Figure 5. Cis-regulation of the *RPP4* immune resistance gene by a *ATCOPIA93*-derived, unmethylated soloLTR.

- A.** Absence of H3K27m3 and H3K9m2 marks at the soloLTR-5 (2 primers sets (1) and (2)), upstream of *RPP4*. qPCRs were performed on ChIP-DNA previously analysed in Fig 3B and Fig EV3C (bio.rep.1) to further validate the epigenetic status inferred from both H3K27m3 and H3K9m2 ChIP-chip (Deleris *et al.*, 2012) and H3K27m3 ChIP-seq data for unique reads (Wang *et al.*, 2016). *UBQ*: negative control for both H3K27m3 and H3K9m2 ChIPs; *FLC*: positive control for H3K27m3; *TA3*: positive control for H3K9m2.
- B.** Depiction of the constructs used to transform the *rrp4* null mutant to assess the impact of LTR mutations on *RPP4* expression. Blue large bars: exons, blue medium bars: transcribed and untranslated regions (UTRs), purple bar: soloLTR-5.
- C.** Box plot representing the mRNA levels of *RPP4* in the presence/absence of the soloLTR-5. 33 primary transformants were analyzed for the «pRPP4::RPP4+ mock» and «pRPP4::RPP4+ PtoΔ28E» datasets and 18 primary transformants were analyzed for «pRPP4ΔLTR::RPP4+ mock» and «pRPP4ΔLTR::RPP4+ PtoΔ28E» datasets. Mock and PtoΔ28E (2.10<sup>8</sup> cfu/ml) infiltrations were performed on two leaves of each individual transformant that were collected at 6 hours post infiltration (hpi). RNA was extracted for each transformant individually, for each treatment, and analyzed by RT-qPCR to determine the *RPP4* mRNA levels relative to *UBIQUITIN* (*At2g36060*) expression. The values obtained for each primary transformant were plotted. The horizontal line in the box represents the median; the edges of the box represent the 25th and 75th percentiles, the whiskers stretch out to the 10-90 percentile above and below the edges of the box; the symbols (dots) represent the outliers. Two tailed p-values were calculated by unpaired T-test with Welch's correction.
- D.** Box plot representing the mRNA levels of *RPP4* in the presence of the W-box1 or the mutated W-box1 (according to Fig 1E) in the soloLTR-5. 23 primary transformants were analyzed for the «pRPP4::RPP4+ mock» and «pRPP4::RPP4+ PtoΔ28E» datasets and 24 primary transformants were analyzed for «pRPP4w1::RPP4+ mock» and «pRPP4w1::RPP4+ PtoΔ28E» datasets. Analyses were as in C.
- E.** The oomycete PAMP NLP20 induces the same molecular responses as PtoΔ28E. Left: Representative pictures of leaves infiltrated with water (mock), 1 μM of NLP20 or effectorless bacteria *PtoΔ28E* at 2.10<sup>8</sup> cfu/ml as a positive control, and incubated with GUS substrate 24hpi (two leaves from three plants per treatment). This result was repeated three times. Right: *GUS* mRNA levels at 3hpi with NLP20 or *PtoΔ28E*. Analyses were performed as in Fig 1.

Together, these results show that a *ATCOPIA93*-derived soloLTR has been co-opted during evolution to *cis*-regulate *RPP4* expression during basal immunity.

## **Discussion**

*ATCOPIA93* has been a widely used model to study plant transposon biology and epigenetics over the last years (Tsukahara *et al*, 2009; Mirouze *et al*, 2009; Tsukahara *et al*, 2012; Marí-Ordóñez *et al*, 2013; Reinders *et al*, 2013; Rigal *et al*, 2016; Oberlin *et al*, 2017). However, with the exception of DNA methylation-defective mutants, the conditions required for the activation of this family, have not been fully explored. Here, we show that the *ATCOPIA93* LTR, in the absence of negative epigenetic control, has the hallmarks of an immune-responsive gene promoter: i) responsiveness to unrelated PAMPs, ii) transient activation upon PAMP elicitation (like early PAMPs-induced genes), iii) suppression of transcriptional activation by bacterial effectors, iv) full dependence on biotic stress-response elements for activation (W-box *cis*-regulatory elements). While *EVD* transcripts had been so far only observed in discrete cell types in the absence of DNA methylation (Marí-Ordóñez *et al*, 2013), we show here that in the presence of the adequate signaling and transcription factors, it can be expressed in other tissues, such as adult leaves.

The connection between TE activation and stress response was particularly well-addressed in studies of the *Tnt1* family of transposons in tobacco, which was found to be responsive to various biotic and abiotic stresses (Pouteau *et al*, 1991, 1994; Moreau-Mhiri *et al*, 1996; Mhiri *et al*, 1997; Grandbastien *et al*, 1997). Additionally, different *Tnt* families were induced by distinct biotic challenges and functional analyses further proved that the structural motifs present in the LTR sequences of *Tnt1* families provided specific transcriptional reactivation to specific stresses (Beguiristain *et al*, 2001). Here, we show that one single element can be induced by PAMPs from bacterial and oomycetes pathogens; thus, in the future it will be important to determine whether the two functional W-boxes in *EVD/ATR* LTR are differentially involved in the induction by different pathogens, which would indicate the binding of different transcription factors to the same *ATCOPIA93* LTR. Our findings in *Arabidopsis*, the primary model plant species for epigenetic analyses, should allow for the investigation of the poorly-understood phenomenon of permissiveness of transposon expression to certain stresses but not to others, and test whether this differential permissiveness could be epigenetically regulated, as was previously proposed for *Tnt1* (Grandbastien *et al*, 2005).

The conditional induction of *EVD* is reminiscent of the heat-stress responsive element *ONSEN* (Ito *et al*, 2011; Cavrak *et al*, 2014) and expands the repertoire of *Arabidopsis* model

TEs that can potentially hijack the transcriptional host machinery during stress responses. Thus, *ONSEN* is not a unique case, and many Arabidopsis TEs could exhibit this restricted reactivation pattern, where lack of DNA methylation will result in transposition if compounded by specific stress signaling. This would imply that the “mobilome”—the fraction of TEs with transposition activity—observed in *ddm1* unstressed mutants (Tsukahara *et al*, 2009) is likely to be underestimated. Here, we focused on the somatic regulation of *ATCOPIA93* in leaf tissues—where transpositions would not be mitotically inherited thus are difficult to detect—with the aim to test the impact of this regulation on defense gene regulation. However, future studies should address the exciting question of enhanced germinal transposition when wild type and *ddm1* flowers will be subjected to PAMP elicitation or infected with pathogens.

One major difference between *ATCOPIA93* and *ONSEN* is that *ATCOPIA93* stress-induced expression in the wild type is more tightly controlled by epigenetic regulation for *ATCOPIA93* than for *ONSEN*. Importantly, we revealed that *ATCOPIA93-EVD*, in addition to be subjected to DNA/H3K9 methylation, is targeted by an additional layer of epigenetic control through PcG silencing, which is generally associated with negative regulation of protein-coding genes and miRNA genes in vegetative tissues (Förderer *et al*, 2016). While DNA methylation and H3K27m3 marks have been described to be largely mutually exclusive, with DNA methylation generally preventing K27m3 deposition (Mathieu *et al*, 2005; Deleris *et al*, 2012; Weinhofer *et al*, 2010; Reddington *et al*, 2013; Saksouk *et al*, 2014), we found co-existence of these two epigenetic marks at *EVD*-LTR at the molecular level. This had already been observed in the endosperm at the pericentromeric *GYPHY* elements (Moreno-Romero *et al*, 2016) as well as in mammals where lower densities of CG methylation were found to allow H3K27m3 deposition (Statham *et al*, 2012; Brinkman *et al*, 2012). Accordingly, *EVD* LTR has only five methylated CGs (Fig 1, Marí-Ordóñez *et al*, 2013), which is low relative to the size of the LTR (roughly 400 bp). Thus, in Arabidopsis vegetative tissues, the co-existence of CG methylation and H3K27m3 can occur, likely constrained by CG density. As for the differential marking between *EVD* and *ATR*, it is presumably due to, or at least favored by, spreading from the neighboring genes marked by H3K27m3. This idea is supported by the almost complete loss of H3K27m3 at *EVD*-LTR in *clf*, a mutant for the PRC2 component CLF, which was recently shown to be involved in the spreading phase of H3K27m3 at the Flowering Locus C (*FLC*) (Yang *et al*, 2017). Future studies should identify and delineate TEs that can potentially recruit PRC2 *in cis* from the ones that become H3K27m3-marked due to an insertional effect, and the ones that exhibit both characteristics. Importantly, we showed that PcG silencing is functional at *EVD ATCOPIA93*, the modest effect of H3K27m3 loss on total *ATCOPIA93* expression

presumably due to the specific *EVD* control by PcG and the functional redundancy of H3K27m3 with DNA methylation, which co-exists at this site. The role of PcG in TE silencing is actually supported by the recent evidence of negative regulators of PcG, such as ALP1, which is encoded by a domesticated transposase (Liang *et al*, 2015) and which is likely evolved to protect TEs from Polycomb-mediated silencing. Interestingly, this negative control of *EVD* by PcG adds an additional epigenetic layer of restriction specifically at the functional *ATCOPIA93* member (which is also less DNA methylated than its pericentromeric counterpart *ATR*), and presumably limits its somatic transposition while the corresponding soloLTR in the *RPP4* promoter is activated for proper regulation during immune response. Notably, this double and differential mC/H3K27m3 marking could allow for unique members of one TE family to be differentially regulated, in particular at discrete stages of development since DNA methylation and PcG are not equivalent in their lability; this might provide the family members with different and discrete windows of opportunities to be expressed and transpose in some restricted tissues, and account for a not-yet appreciated strategy of TEs to adapt to their host.

Interestingly, the *ATCOPIA93*-LTR::*GUS* fusion was consistently found to be unmethylated in various transgenic lines in the wild-type Col-0 background, concordant with LTR::*GUS* reactivation in response to *Pto*Δ28E. This lack of *de novo* methylation upon transformation may be explained by weak LTR transcriptional activity in untreated plants thus preventing expression-dependent RNA-directed DNA Methylation (Fultz & Slotkin, 2017) and/or by low levels of CHH methylation/siRNAs at *ATCOPIA93* (Fig 1A) (Mirouze *et al*, 2009; Marí-Ordóñez *et al*, 2013)), thus preventing identity-based silencing *in trans* (Fultz & Slotkin, 2017). Similarly, in wild type plants, the *ATCOPIA93*-soloLTRs appear usually to be unmethylated (Fig EV5A), in particular the soloLTR-5 described in detail here. This absence of methylation allowed us to test for a role of the *ATCOPIA93* LTR as a “fully competent” transcriptional module in immunity, *i.e.*, not masked by DNA methylation. This is a different role from the one previously described as an epigenetic module, interfering negatively with downstream expression, when the LTR was artificially methylated *in trans* by siRNAs produced by *EVD* after a burst of transposition in specific epiRIL lines (Marí-Ordóñez *et al*, 2013). The latter results may provide an explanation for the peculiar epigenetic control of *EVD*, which is almost exclusively controlled by CG methylation (Fig1A, Mirouze *et al*, 2009), although it belongs to an evolutionary young family of TEs: the preferred targets of POLYMERASE V, siRNAs and the RNA-directed DNA methylation (RdDM) pathway (Zhong *et al*, 2012). We propose that the low levels of *EVD* LTR siRNAs, which could methylate the soloLTR-5 *in trans* if present in larger quantities, could be the result of evolutionarily selection,

so that soloLTR-5 remains unmethylated and proper immune response can be properly activated.

Transposable elements have been proposed to contribute not only to the diversification of disease resistance genes, which are among the fastest evolving genes, but also, following their diversification, to the evolution of their *cis*-regulation, as part of their maturation process (Lai & Eulgem, 2017). Compelling evidence exists for the latter role (Hayashi & Yoshida, 2009; Tsuchiya & Eulgem, 2013; Deng *et al*, 2017; Lai & Eulgem, 2017). In the present study, we have brought another demonstration for the *cis*-regulatory role of TEs, and for the first time we have linked the co-option of a soloLTR for proper expression of a functional disease resistance gene (*RPP4*) and the responsiveness of the corresponding full-length retroelement (*COPIA93 EVD/ATR*), through its LTR, during basal immunity. TEs have been long thought to be a motor of adaptive genetic changes in response to stress (McClintock, 1984). The link we established between responsiveness of a retroelement to biotic stress and its co-option for regulation of immunity provides experimental support to McClintock's early model that TEs play a role in the genome response to environmental cues. Future studies should address the extent of the TE repertoire with such restricted expression to adapt to their host, in the light of recent findings showing that not only TEs often abound in disease resistance gene clusters, but also transpose there the most frequently (Quadrana *et al*, 2016).



# **Materials&Methods**

## **Plant material and growth condition**

Plants were grown at 22°C with an 8h light/16h dark photoperiod (short days) and experiments were generally performed on 4.5 to 5-week-old rosette leaves. Apart from Figure 3, where plants were analyzed in the absence of treatment, plants were infiltrated with a syringe with either water (“mock”), synthetic flg22 (Genescript) at 1μM concentration or a suspension of bacteria as described below, always at the same time in the morning (between 10 and 11.30am, depending on the number of plants to infiltrate). Plants were then covered with a clear plastic dome until tissue harvest to allow high humidity (Xin *et al*, 2016). For Figure 4B, 3.5-week-old seedlings grown on MS plates were transferred to liquid MS for at least 24h then infiltrated with either water or a suspension of bacteria and put back to light for 2 hours.

## **Mutant lines**

We used the *met1-3* allele (Saze *et al*, 2003), the *ddm1-2* allele (Vongs *et al*, 1993) and the *clf-29* allele (Bouveret, 2006). For Figures 1 and 2, first generation homozygous *met1-3* and *ddm1-2* mutants were genotyped and used for analysis; for Figure 4, second generation *ddm1-2* homozygous mutants were used.

## **Generation of transgenic lines**

### **- LTR::GUS transgenic lines**

EVD-LTR was cloned into a pENTR/D-TOPO vector, then in a pBGWFS7 binary vector, upstream of the GUS sequence. LTR::GUS constructs were transformed in the Col0 accession by standard Agrobacterium transformation protocol (Clough & Bent, 1998). Primary transformants were selected with Basta herbicide. Four lines were selected on the basis of 3:1 segregation of the transgene (single insertion) and brought to T3 generation (#2, #12, #4, #6) where the transgene was in a homozygous state and all four lines behave similarly as for GUS expression. Most experiments were performed on stable T3 lines (#12) homozygotes for the LTR::GUS transgene, and some in their progeny (T4) after checking that the absence of DNA methylation persisted. The mutations in W-boxes 1 and 2 were introduced in pENTR vector by overlapping PCR and the mutated LTRs cloned in pBGWFS7. Experiments were performed on individual primary transformants for WT and mutated constructs. Transgenic plants were sequenced to verify the presence of the mutations at the LTR transgene.

#### - pRPP4::RPP4 transgenic lines

For the “WT” construct, a 3kb sequence upstream of RPP4 predicted TSS was cloned in pENTRD-TOPO; for the “ΔLTR” construct, the same 3kb sequence minus the soloLTR-5 was synthesized and cloned in the same vector; for the “w1” construct, site-directed mutagenesis was used on the “WT” pENTRD-TOPO. A fragment corresponding to the *RPP4* gDNA (with introns and UTRs) was then amplified from wild-type plants and cloned after the RPP4 promoter in the three different “WT”, “ΔLTR” and “w1” pENTRD-TOPO vectors using restriction enzymes. The resulting vectors were recombined with pH7WG. Primary transformants were selected on hygromycin and analyzed individually.

#### **Bacterial strains and preparation of inocula**

The bacterial strains used are *Pseudomonas syringae* pv *tomato* *Pto* DC3000 (“*Pto*”) and a non-pathogenic derivative of *Pseudomonas syringae* pv *tomato* *Pto* DC3000 in which 28 out of 36 effectors are deleted (Cunnac *et al*, 2011), referred here as “*Pto*Δ28E”. Bacteria were first grown on standard NYGA solid medium at 28°C with appropriate selection, then overnight on standard NYGB liquid medium. Bacteria were pelleted and washed with water twice. Suspensions of 2.10<sup>8</sup>cfu/ml were used for *Pto*Δ28E except for Figure 1C where suspensions of 1.10<sup>7</sup>cfu/ml were used to compare to a same inoculum of *Pto* DC3000.

#### **Histochemical GUS staining**

GUS staining was performed as in (Yu *et al*, 2013). Briefly, leaves were placed in microplates containing a GUS staining buffer, vacuum infiltrated three times during 15 min, and incubated overnight at 37 °C. Leaves were subsequently washed several times in 70% ethanol.

#### **SDS-PAGE and Western blotting**

Leaf total protein extracts were obtained by using the Tanaka method, quantified by standard BCA assay and 100 µg were resolved on SDS/PAGE. After electroblotting the proteins on a Polyvinylidene difluoride (PVDF) membrane, GUS protein analysis was performed using an antibody against the GFP since pBGWFS7 contains a GUS-GFP fusion and the anti-GFP antibody (Clontech #632380) was more specific, and stained with a standard coomassie solution to control for equal loading.

## **DNA extraction and bisulfite conversion**

DNA extraction and bisulfite conversion was performed as in Yu *et al*, 2013 except that the DNA was not sonicated before bisulfite conversion and 17 to 22 clones were analyzed per experiment.

## **RNA extraction and qRT-PCR analyses**

Total RNA was extracted using RNeasy Plant Mini kit (Qiagen or Macherey-Nagel). One µg of DNA-free RNA was reverse transcribed using qScript cDNA Supermix (Quanta Biosciences) and either oligo(dT) and random hexamers mix or a transcript-specific primer for GUS mRNA analysis. cDNA was then amplified in RT q-PCR reactions using Takyon SYBR Green Supermix (Eurogentec) and transcript-specific primers on a Roche Light Cycler 480 thermocycler. For each biological replicate, two or three technical replicates were averaged when the qPCR corresponding values were within 0.5 cycles. Expression was normalized to *UBIQUITIN* (*At2g36060*) expression. In addition, for Figure 4A, two reverse-transcription reactions were performed for each biological replicate – in particular, in order to obtain enough cDNA for pyrosequencing- and qPCRs technical replicates averaged. The PCR parameters are: 1 cycle of 10 minutes at 95°C, 45 cycles of 10 s at 95°C, 40 s at 60°C.

## **Chromatin immunoprecipitation and ChIP-qPCR analyses**

ChIPs were performed as in (Bernatavichute *et al*, 2008), starting with 0.3 g to 1 g (per ChIP) of adult leaves that were previously crosslinked by vacuum-infiltration of a 1% formaldehyde solution. Antibodies against H3K27m3 and H3K9m2 are from MILLIPORE (07-449) and ABCAM (ab1220) respectively. 2 µl of a 1:10 dilution of the IP was used for qPCR. The PCR parameters are: 1 cycle of 10 minutes at 95°C, 45 cycles of 10 s at 95°C, 40 s at 60°C.

## **Methylation-sensitive enzyme assay (“Chop-assay”)**

Two hundred ng of gDNA (Fig EV1) or 10 to 20 ng of ChIP-DNA (10 ng for Input DNA) (Fig 3) was digested overnight at 37°C with 1 µL or 0,5 µl respectively of Sau96I enzyme (Thermoscientist FD0194). As Sau96I cannot be heat-inactivated, DNA was then purified with a clean-up column (Macherey Nagel nucleospin column) (Fig 1A) or, when the amount of material was limited (Fig 3) by standard phenol-chloroform extraction using glycogen to precipitate the DNA. DNA was eluted in 20 µl of water or pellets were resuspended in 20 µl of water; qPCR were performed using 0,3ul and primers that amplify an amplicon spanning the

Sau96I site. The same amount of the corresponding non-digested DNA was used for qPCR as a control and to normalize the data.

### **Pyrosequencing**

*ATCOPIA93* DNA (ChIP-DNA, cDNA or gDNA as a control) was amplified with a biotinylated (forward) primer in the same region where RNA levels were analyzed and containing a SNP between *EVD* and *ATR*; the biotinylated PCR product (40 µl reaction) was pulled down with streptavidin beads (sigma GE17-5113-01) and the sense biotinylated strand sequenced with a Pyromark Q24 (Qiagen) on the sequencing mode. Input DNA was used as a control for equal contribution of each SNP. Analysis and quality check of the peaks were done with the Pyromark Q24 companion software which delivers pyrograms indicating the % of each nucleotide at the interrogated SNP. These percentages were directly plotted for each biological replicate in the Extended Views and averaged for clarity of presentation in the main figures.

**Authors contributions:** A.D., J.Z., A.Y., J.W. performed the experiments, A.D. and J.Z. analyzed the data; J.D. performed bioinformatic searches; A.D, J.Z. and L.N. designed the experiments; A.D. wrote the manuscript.

**Acknowledgments:** We thank the members of the Navarro Lab for their input and discussions as well as the Bourc'his and Felix Labs for their help with pyrosequencing, D. Bouyer and L. Quadrana for discussions, H. Keller for valuable comments, M. Greenberg and M. Boccara for critical reading of the manuscript and discussions.

Funding source: This work was funded by an ANR-retour post doc (ANR-11-PDOC-0007-01) granted to A.D. and a Human Frontier Scientific Program Career Development Award (HFSP-CDA-00018/2014) granted to A.D.

All authors have seen and approved the manuscript.

# References

- Asai S & Shirasu K (2015) Plant cells under siege: Plant immune system versus pathogen effectors. *Curr. Opin. Plant Biol.* **28**: 1–8 Available at: <http://dx.doi.org/10.1016/j.pbi.2015.08.008>
- Basenko EY, Sasaki T, Ji L, Prybol CJ, Burckhardt RM, Schmitz RJ & Lewis ZA (2015) Genome-wide redistribution of H3K27me3 is linked to genotoxic stress and defective growth. *Proc. Natl. Acad. Sci.* **112**: E6339–E6348
- Beguiristain T, Grandbastien M-A, Puigdomènech P & Casacuberta JM (2001) Three Tnt1 subfamilies show different stress-associated patterns of expression in tobacco. Consequences for retrotransposon control and evolution in plants. *Plant Physiol.* **127**: 212–221 Available at: <http://www.plantphysiol.org/cgi/doi/10.1104/pp.127.1.212>
- Bernatavichute Y V., Zhang X, Cokus S, Pellegrini M & Jacobsen SE (2008) Genome-wide association of histone H3 lysine nine methylation with CHG DNA methylation in Arabidopsis thaliana. *PLoS One* **3**: e3156
- Van Der Biezen EA, Freddie CT, Kahn K, Parker JE & Jones JDG (2002) Arabidopsis RPP4 is a member of the RPP5 multigene family of TIR-NB-LRR genes and confers downy mildew resistance through multiple signalling components. *Plant J.* **29**: 439–451
- Boutrot F & Zipfel C (2017) Function, Discovery, and Exploitation of Plant Pattern Recognition Receptors for Broad-Spectrum Disease Resistance. *Annu. Rev. Phytopathol.* **55**: 257–286 Available at: <http://www.annualreviews.org/doi/10.1146/annurev-phyto-080614-120106>
- Bouveret R (2006) Regulation of flowering time by Arabidopsis MSI1. *Development* **133**: 1693–1702 Available at: <http://dev.biologists.org/cgi/doi/10.1242/dev.02340>
- Brinkman AB, Gu H, Bartels SJJ, Zhang Y, Matarese F, Simmer F, Marks H, Bock C, Gnirke A, Meissner A & Stunnenberg HG (2012) Sequential ChIP-bisulfite sequencing enables direct genome-scale investigation of chromatin and DNA methylation cross-talk. *Genome Res.* **22**: 1128–1138
- Cao X & Jacobsen SE (2002) Role of the Arabidopsis DRM methyltransferases in de novo DNA methylation and gene silencing. *Curr. Biol.* **12**: 1138–1144
- Cavrak V V., Lettner N, Jamge S, Kosarewicz A, Bayer LM & Mittelsten Scheid O (2014) How a Retrotransposon Exploits the Plant's Heat Stress Response for Its Activation. *PLoS Genet.* **10**: e1004115
- Chan SW-L (2004) RNA Silencing Genes Control de Novo DNA Methylation. *Science.* **303**: 1336–1336 Available at: <http://www.sciencemag.org/cgi/doi/10.1126/science.1095989>
- Chuong EB, Elde NC & Feschotte C (2016) Regulatory activities of transposable elements: from conflicts to benefits. *Nat. Rev. Genet.* **18**: 71–86 Available at: <http://dx.doi.org/10.1038/nrg.2016.139>
- Clough SJ & Bent AF (1998) Floral dip: A simplified method for Agrobacterium-mediated transformation of Arabidopsis thaliana. *Plant J.* **16**: 735–743
- Cunnac S, Chakravarthy S, Kvitko BH, Russell AB, Martin GB & Collmer A (2011) Genetic disassembly and combinatorial reassembly identify a minimal functional repertoire of type III effectors in Pseudomonas syringae. *Proc. Natl. Acad. Sci. U. S. A.* **108**: 2975–80
- Deleris A, Halter T & Navarro L (2016) DNA Methylation and Demethylation in Plant Immunity. *Annu. Rev. Phytopathol.* **54**: 579–603 Available at: <http://www.annualreviews.org/doi/10.1146/annurev-phyto-080615-100308>
- Deleris A, Stroud H, Bernatavichute Y, Johnson E, Klein G, Schubert D & Jacobsen SE (2012) Loss of the DNA Methyltransferase MET1 Induces H3K9 Hypermethylation at PcG Target Genes and Redistribution of H3K27 Trimethylation to Transposons in Arabidopsis thaliana. *PLoS Genet.* **8**: e1003062 Available at: <http://dx.plos.org/10.1371/journal.pgen.1003062>
- Deng Y, Zhai K, Xie Z, Yang D, Zhu X, Liu J, Wang X, Qin P, Yang Y, Zhang G, Li Q, Zhang J, Wu S, Milazzo J, Mao B, Wang E, Xie H, Tharreau D & He Z (2017) Epigenetic regulation of antagonistic receptors confers rice blast resistance with yield balance. *Science.* **8898**: eaai8898 Available at: <http://www.sciencemag.org/lookup/doi/10.1126/science.aai8898>
- Du J, Johnson LM, Jacobsen SE & Patel DJ (2015) DNA methylation pathways and their crosstalk with histone methylation. *Nat. Rev. Mol. Cell Biol.* **16**: 519–532 Available at: <http://www.nature.com/doi/10.1038/nrm4043>
- Förderer A, Zhou Y & Turck F (2016) The age of multiplexity: Recruitment and interactions of Polycomb complexes in plants. *Curr. Opin. Plant Biol.* **29**: 169–178
- Fultz D & Slotkin RK (2017) Exogenous Transposable Elements Circumvent Identity-Based Silencing, Permitting the Dissection of Expression-Dependent Silencing. *Plant Cell* **29**: 360–376 Available at: <http://www.plantcell.org/lookup/doi/10.1105/tpc.16.00718>
- Gehring M, Bubbs KL & Henikoff S (2009) Extensive Demethylation of Repetitive Elements During Seed Development Underlies Gene Imprinting. *Science (80-. ).* **324**: 1447–1451 Available at:



- <http://www.sciencemag.org/cgi/doi/10.1126/science.1171609>
- Grandbastien M a, Lucas H, Morel JB, Mhiri C, Vernhettes S & Casacuberta JM (1997) The expression of the tobacco Tnt1 retrotransposon is linked to plant defense responses. *Genetica* **100**: 241–252
- Grandbastien MA, Audeon C, Bonnivard E, Casacuberta JM, Chalhoub B, Costa APP, Le QH, Melayah D, Petit M, Poncet C, Tam SM, Van Sluys MA & Mhiri C (2005) Stress activation and genomic impact of Tnt1 retrotransposons in Solanaceae. *Cytogenet. Genome Res.* **110**: 229–241
- Hayashi K & Yoshida H (2009) Refunctionalization of the ancient rice blast disease resistance gene Pit by the recruitment of a retrotransposon as a promoter. *Plant J.* **57**: 413–425
- Huettel B, Kanno T, Daxinger L, Aufsatz W, Matzke AJM & Matzke M (2006) Endogenous targets of RNA-directed DNA methylation and Pol IV in Arabidopsis. *EMBO J.* **25**: 2828–2836 Available at: <http://emboj.embopress.org/cgi/doi/10.1038/sj.emboj.7601150>
- Ito H, Gaubert H, Bucher E, Mirouze M, Vaillant I & Paszkowski J (2011) An siRNA pathway prevents transgenerational retrotransposition in plants subjected to stress. *Nature* **472**: 115–119 Available at: <http://www.nature.com/doi/10.1038/nature09861>
- Jeddeloh J a, Stokes TL & Richards EJ (1999) Maintenance of genomic methylation requires a SWI2/SNF2-like protein. *Nat. Genet.* **22**: 94–97
- Kankel MW, Ramsey DE, Stokes TL, Flowers SK, Haag JR, Jeddeloh JA, Riddle NC, Verbsky ML & Richards EJ (2003) Arabidopsis MET1 cytosine methyltransferase mutants. *Genetics* **163**: 1109–1122
- Katagiri F (2004) A global view of defense gene expression regulation – a highly interconnected signaling network. *Curr. Opin. Plant Biol.* **7**: 506–511 Available at: <http://linkinghub.elsevier.com/retrieve/pii/S1369526604001050>
- Lai Y & Eulgem T (2017) Transcript-level expression control of plant NLR genes. *Mol. Plant Pathol.* **1**: 1–28 Available at: <http://doi.wiley.com/10.1111/mpp.12607>
- Liang SC, Hartwig B, Perera P, Mora-García S, de Leau E, Thornton H, de Alves FL, Rapsilber J, Yang S, James GV, Schneeberger K, Finnegan EJ, Turck F & Goodrich J (2015) Kicking against the PRCs – A Domesticated Transposase Antagonises Silencing Mediated by Polycomb Group Proteins and Is an Accessory Component of Polycomb Repressive Complex 2. *PLoS Genet.* **11**: 1–26
- Lippman Z, Gendrel A-V, Black M, Vaughn MW, Dedhia N, Richard McCombie W, Lavine K, Mittal V, May B, Kasschau KD, Carrington JC, Doerge RW, Colot V & Martienssen R (2004) Role of transposable elements in heterochromatin and epigenetic control. *Nature* **430**: 471–476 Available at: <http://www.nature.com/doi/10.1038/nature02651>
- Liu J, He Y, Amasino R & Chen X (2004) siRNAs targeting an intronic transposon in the regulation of natural flowering behavior in Arabidopsis. *Genes Dev.* **18**: 2873–2878
- Marí-Ordóñez A, Marchais A, Etcheverry M, Martin A, Colot V & Voinnet O (2013) Reconstructing de novo silencing of an active plant retrotransposon. *Nat. Genet.* **45**: 1029–1039 Available at: <http://www.nature.com/doi/10.1038/ng.2703>
- Mathieu O, Probst A V & Paszkowski J (2005) Distinct regulation of histone H3 methylation at lysines 27 and 9 by CpG methylation in Arabidopsis. *EMBO J.* **24**: 2783–2791 Available at: <http://emboj.embopress.org/cgi/doi/10.1038/sj.emboj.7600743>
- McClintock B (1984) Nobel Lecture. The significance of response of the genome to challenge. *Science.* **226**: 792–801
- Mhiri C, Morel JB, Vernhettes S, Casacuberta JM, Lucas H & Grandbastien MA (1997) The promoter of the tobacco Tnt1 retrotransposon is induced by wounding and by abiotic stress. *Plant Mol. Biol.* **33**: 257–266
- Mirouze M, Reinders J, Bucher E, Nishimura T, Schneeberger K, Ossowski S, Cao J, Weigel D, Paszkowski J & Mathieu O (2009a) Selective epigenetic control of retrotransposition in Arabidopsis. *Nature* **461**: 427–430 Available at: <http://www.nature.com/doi/10.1038/nature08328>
- Moreau-Mhiri C, Morel J-B, Audeon C, Ferault M, Grandbastien M-A & Lucas H (1996) Regulation of expression of the tobacco Tnt1 retrotransposon in heterologous species following pathogen-related stresses. *Plant J.* **9**: 409–419
- Moreno-Romero J, Jiang H, Santos-Gonzalez J & Kohler C (2016) Parental epigenetic asymmetry of PRC2-mediated histone modifications in the Arabidopsis endosperm. *EMBO J.* **1**: 1–14 Available at: <http://emboj.embopress.org/cgi/doi/10.15252/emboj.201593534>
- Naito K, Zhang F, Tsukiyama T, Saito H, Hancock CN, Richardson AO, Okumoto Y, Tanisaka T & Wessler SR (2009) Unexpected consequences of a sudden and massive transposon amplification on rice gene expression. *Nature* **461**: 1130–1134 Available at: <http://www.nature.com/doi/10.1038/nature08479>
- Noel L (1999) Pronounced Intraspecific Haplotype Divergence at the RPP5 Complex Disease Resistance Locus of Arabidopsis. *Plant Cell Online* **11**: 2099–2112 Available at: <http://www.plantcell.org/cgi/doi/10.1105/tpc.11.11.2099>
- Oberlin S, Sarazin A, Chevalier C, Voinnet O & Marí-Ordóñez A (2017) A genome-wide transcriptome and translatome analysis of Arabidopsis transposons identifies a unique and conserved genome expression

- strategy for Ty1/Copia retroelements. *Genome Res.* **27**: 1549–1562
- Oome S, Raaymakers TM, Cabral A, Samwel S, Böhm H & Albert I (2014) Nep1-like proteins from three kingdoms of life act as a microbe-associated molecular pattern in Arabidopsis. *Proc. Natl. Acad. Sci.* **111**: 16955–60
- Pouteau S, Grandbastien MA & Boccara M (1994) Microbial elicitors of plant defense response activate transcription of a retrotransposon. *Plant J.* **5**: 535
- Pouteau S, Huttner E, Grandbastien M a. & M.Caboche M (1991) Specific expression of the tobacco Tnt1 in protoplasts. *EMBO J.* **10**: 1911–1918
- Quadrana L, Bortolini Silveira A, Mayhew GF, LeBlanc C, Martienssen RA, Jeddeloh JA & Colot V (2016) The Arabidopsis thaliana mobilome and its impact at the species level. *Elife* **5**: 1–25 Available at: <http://elifesciences.org/lookup/doi/10.7554/eLife.15716>
- Reddington JP, Perricone SM, Nestor CE, Reichmann J, Youngson NA, Suzuki M, Reinhardt D, Dunican DS, Prendergast JG, Mjoseng H, Ramsahoye BH, Whitelaw E, Grealley JM, Adams IR, Bickmore WA & Meehan RR (2013) Redistribution of H3K27me3 upon DNA hypomethylation results in de-repression of Polycomb target genes. *Genome Biol.* **14**: R25 Available at: <http://genomebiology.biomedcentral.com/articles/10.1186/gb-2013-14-3-r25>
- Reinders J, Mirouze M, Nicolet J & Paszkowski J (2013) Parent-of-origin control of transgenerational retrotransposon proliferation in Arabidopsis. *EMBO Rep.* **14**: 823–828 Available at: <http://embor.embopress.org/cgi/doi/10.1038/embor.2013.95>
- Rigal M, Becker C, Pélissier T, Pogorelnik R, Devos J, Ikeda Y, Weigel D & Mathieu O (2016) Epigenome confrontation triggers immediate reprogramming of DNA methylation and transposon silencing in Arabidopsis thaliana F1 epihybrids. *Proc. Natl. Acad. Sci.* **113**: E2083–E2092 Available at: <http://www.pnas.org/lookup/doi/10.1073/pnas.1600672113>
- Rushton PJ, Somssich IE, Ringler P & Shen QJ (2010) WRKY transcription factors. *Trends Plant Sci.* **15**: 247–258 Available at: <http://dx.doi.org/10.1016/j.tplants.2010.02.006>
- Saksouk N, Barth TK, Ziegler-Birling C, Olova N, Nowak A, Rey E, Mateos-Langerak J, Urbach S, Reik W, Torres-Padilla ME, Imhof A & Déjardin J (2014) Redundant Mechanisms to Form Silent Chromatin at Pericentromeric Regions Rely on BEND3 and DNA Methylation. *Mol. Cell* **56**: 580–594
- Saze H, Scheid OM & Paszkowski J (2003) Maintenance of CpG methylation is essential for epigenetic inheritance during plant gametogenesis. *Nat. Genet.* **34**: 65–69 Available at: <http://www.nature.com/doi/10.1038/ng1138>
- Schwessinger B & Zipfel C (2008) News from the frontline: recent insights into PAMP-triggered immunity in plants. *Curr. Opin. Plant Biol.* **11**: 389–395
- Statham AL, Robinson MD, Song JZ, Coolen MW, Stirzaker C & Clark SJ (2012) Bisulfite sequencing of chromatin immunoprecipitated DNA (BisChIP-seq) directly informs methylation status of histone-modified DNA. *Genome Res.* **22**: 1120–1127
- Stroud H, Do T, Du J, Zhong X, Feng S, Johnson L, Patel DJ & Jacobsen SE (2014) Non-CG methylation patterns shape the epigenetic landscape in Arabidopsis. *Nat. Struct. Mol. Biol.* **21**: 64–72 Available at: <http://www.ncbi.nlm.nih.gov/pubmed/24336224>
- Tsuchiya T & Eulgem T (2013) An alternative polyadenylation mechanism coopted to the Arabidopsis RPP7 gene through intronic retrotransposon domestication. *Proc. Natl. Acad. Sci.* **110**: E3535–E3543 Available at: <http://www.pnas.org/cgi/doi/10.1073/pnas.1312545110>
- Tsukahara S, Kawabe A, Kobayashi A, Ito T, Aizu T, Shin-i T, Toyoda A, Fujiyama A, Tarutani Y & Kakutani T (2012) Centromere-targeted de novo integrations of an LTR retrotransposon of Arabidopsis lyrata. *Genes Dev.* **26**: 705–713
- Tsukahara S, Kobayashi A, Kawabe A, Mathieu O, Miura A & Kakutani T (2009) Bursts of retrotransposition reproduced in Arabidopsis. *Nature* **461**: 423–426 Available at: <http://www.nature.com/doi/10.1038/nature08351>
- Vongs A, Kakutani T, Martienssen RA & Richardst EJ (1993) Arabidopsis thaliana DNA Methylation Mutants. *Science* . **260**: 1926–1928
- Walter M, Teissandier A, Pérez-Palacios R & Bourc’His D (2016) An epigenetic switch ensures transposon repression upon dynamic loss of DNA methylation in embryonic stem cells. *Elife* **5**: 1–30
- Weinhofer I, Hehenberger E, Roszak P, Hennig L & Kohler C (2010) H3K27me3 profiling of the endosperm implies exclusion of polycomb group protein targeting by DNA methylation. *PLoS Genet.* **6**: 1–14
- Xin X-F, Nomura K, Aung K, Velásquez AC, Yao J, Boutrot F, Chang JH, Zipfel C & He SY (2016) Bacteria establish an aqueous living space in plants crucial for virulence. *Nature* **539**: 524–529 Available at: <http://www.nature.com/doi/10.1038/nature20166>
- Yang H, Yang H, Berry S, Olsson TSG, Hartley M, Howard M & Dean C (2017) Distinct phases of Polycomb silencing to hold epigenetic memory of cold in Arabidopsis. *Science (80-. )*. **1121**: 1–9
- Yu A, Lepere G, Jay F, Wang J, Bapaume L, Wang Y, Abraham A-L, Penterman J, Fischer RL, Voinnet O &

- Navarro L (2013) Dynamics and biological relevance of DNA demethylation in Arabidopsis antibacterial defense. *Proc. Natl. Acad. Sci.* **110**: 2389–2394 Available at: <http://www.pnas.org/cgi/doi/10.1073/pnas.1211757110>
- Zemach A, Kim MY, Hsieh PH, Coleman-Derr D, Eshed-Williams L, Thao K, Harmer SL & Zilberman D (2013) The arabidopsis nucleosome remodeler DDM1 allows DNA methyltransferases to access H1-containing heterochromatin. *Cell* **153**: 193–205 Available at: <http://dx.doi.org/10.1016/j.cell.2013.02.033>
- Zhong X, Hale CJ, Law JA, Johnson LM, Feng S, Tu A & Jacobsen SE (2012) DDR complex facilitates global association of RNA polymerase V to promoters and evolutionarily young transposons. *Nat. Struct. Mol. Biol.* **19**: 870–875 Available at: <http://www.nature.com/doi/10.1038/nsmb.2354>
- Zipfel C, Kunze G, Chinchilla D, Caniard A, Jones JDG, Boller T & Felix G (2006) Perception of the Bacterial PAMP EF-Tu by the Receptor EFR Restricts Agrobacterium-Mediated Transformation. *Cell* **125**: 749–760
- Zipfel C, Robatzek S, Navarro L, Oakeley EJ, Jones JDG, Felix G & Boller T (2004) Bacterial disease resistance in Arabidopsis through flagellin perception. *Nature* **428**: 764–767 Available at: <http://www.nature.com/doi/10.1038/nature02485>

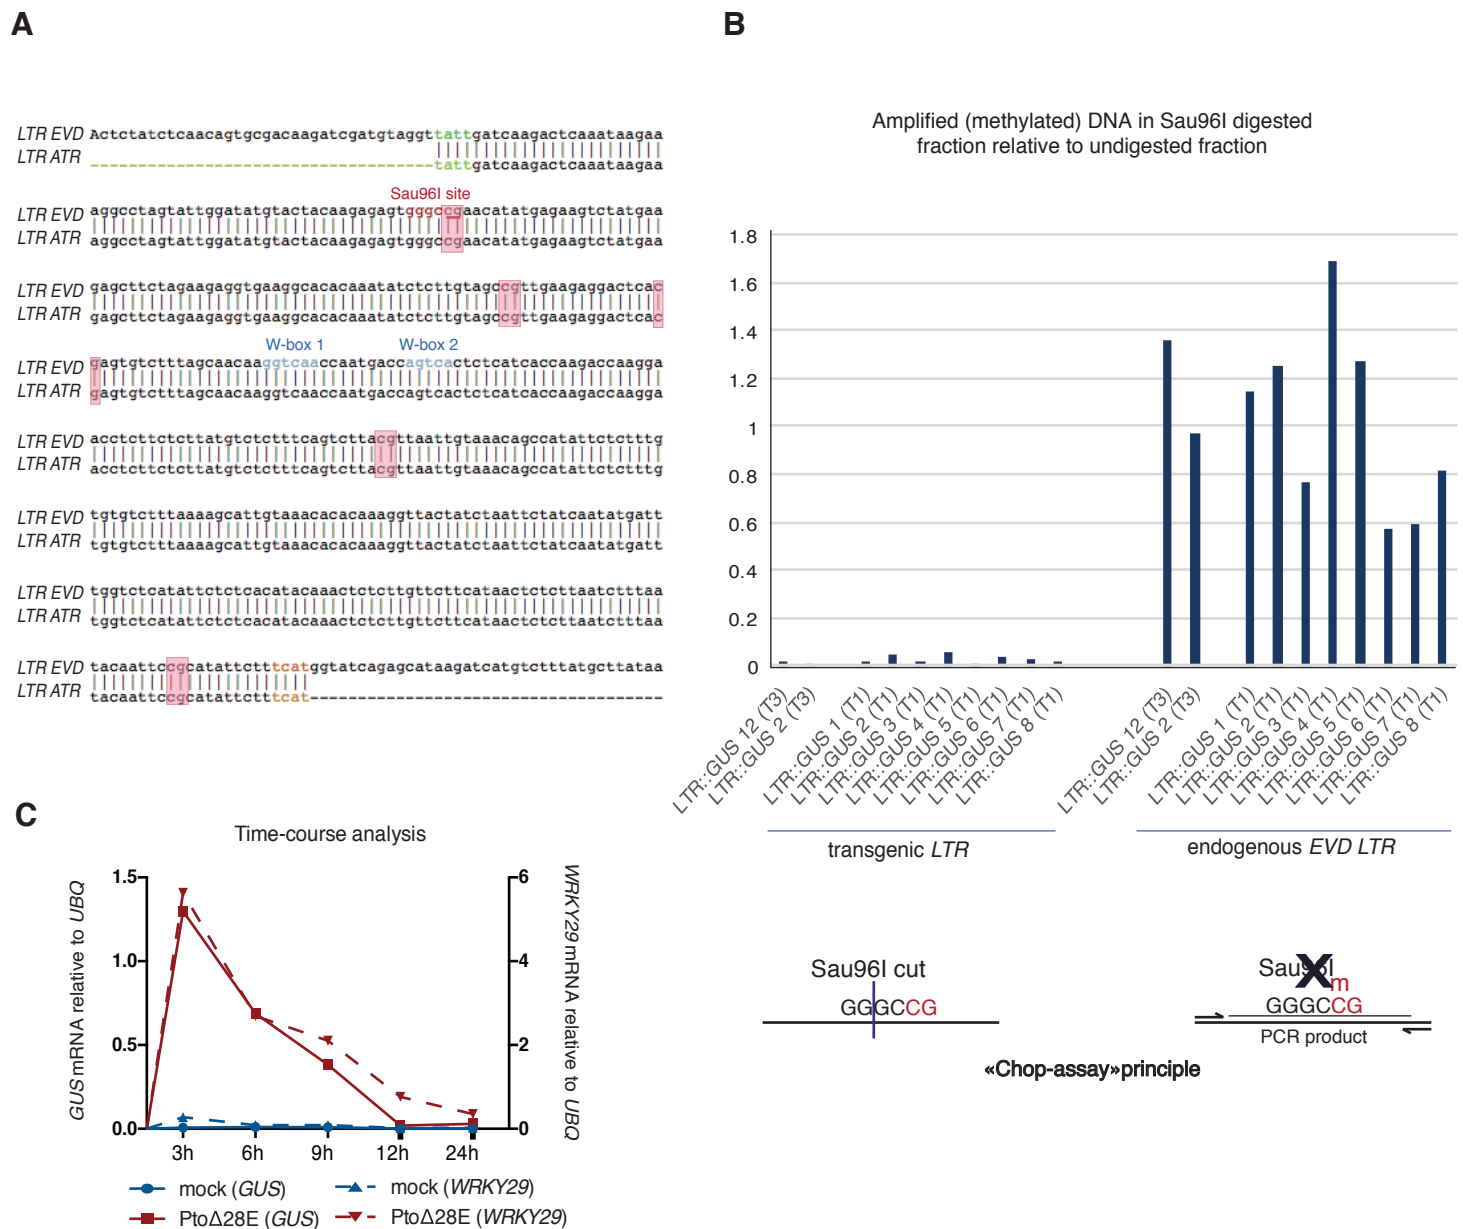

**Figure EV1.**

**A.** Alignment between the LTRs of *ATCOPIA93-EVD* and *ATCOPIA93-ATR* showing that they are identical in sequence. The two W-boxes tested in Fig 1 are highlighted in blue; the beginning and end of the LTRs of the *ATCOPIA93* family are highlighted in green and orange respectively; the GGGCC sequence in red is the site recognized by Sau96I methylation-sensitive restriction enzyme and underlined is the CG site analyzed by Chop-qPCR in Fig EV1B and Fig 3D. The five CG sites of the LTR, unmethylated in the transgene, are highlighted with pink boxes.

**B.** Methylation status of the DNA (CG site) at the LTR in LTR::GUS transgenic plants by Sau96I Chop-qPCR. DNA from a pool of leaves of single primary transformants and pools of T3 homozygous plants was digested with the methylation sensitive restriction endonuclease Sau96I which recognizes GGNCC sites- here GGGCCG- and is sensitive to methylation of the second C. Digested DNA was quantified by using qPCR with primers spanning a Sau96I restriction site in the LTR. On the left, primers were specific for the transgenic LTR (one primer in the vector) : lack of amplification shows unmethylation of the CG site in the transgenic LTR. On the right, as a control, the same DNA was analyzed with primers specific for the endogenous EVD LTR (one primer upstream of EVD): amplification shows methylation of the CG site in the endogenous 5' LTR sequence. The signal was normalized to an undigested control. The assay principle is schematized under the graph.

**C.** Additional independent experiment for the time-course analysis of GUS mRNA (plain lines) and PTI-marker WRKY29 mRNA (dashed lines) by RT-qPCR. The experiment was performed as in Fig 1C.

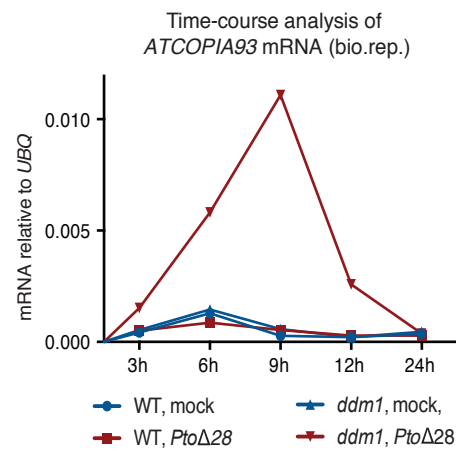

**Figure EV2.** Biological replicate (independent experiment) for the time course analysis of *ATCOPIA93* mRNA by RT-qPCR. The experiment was performed as in Fig 2A.

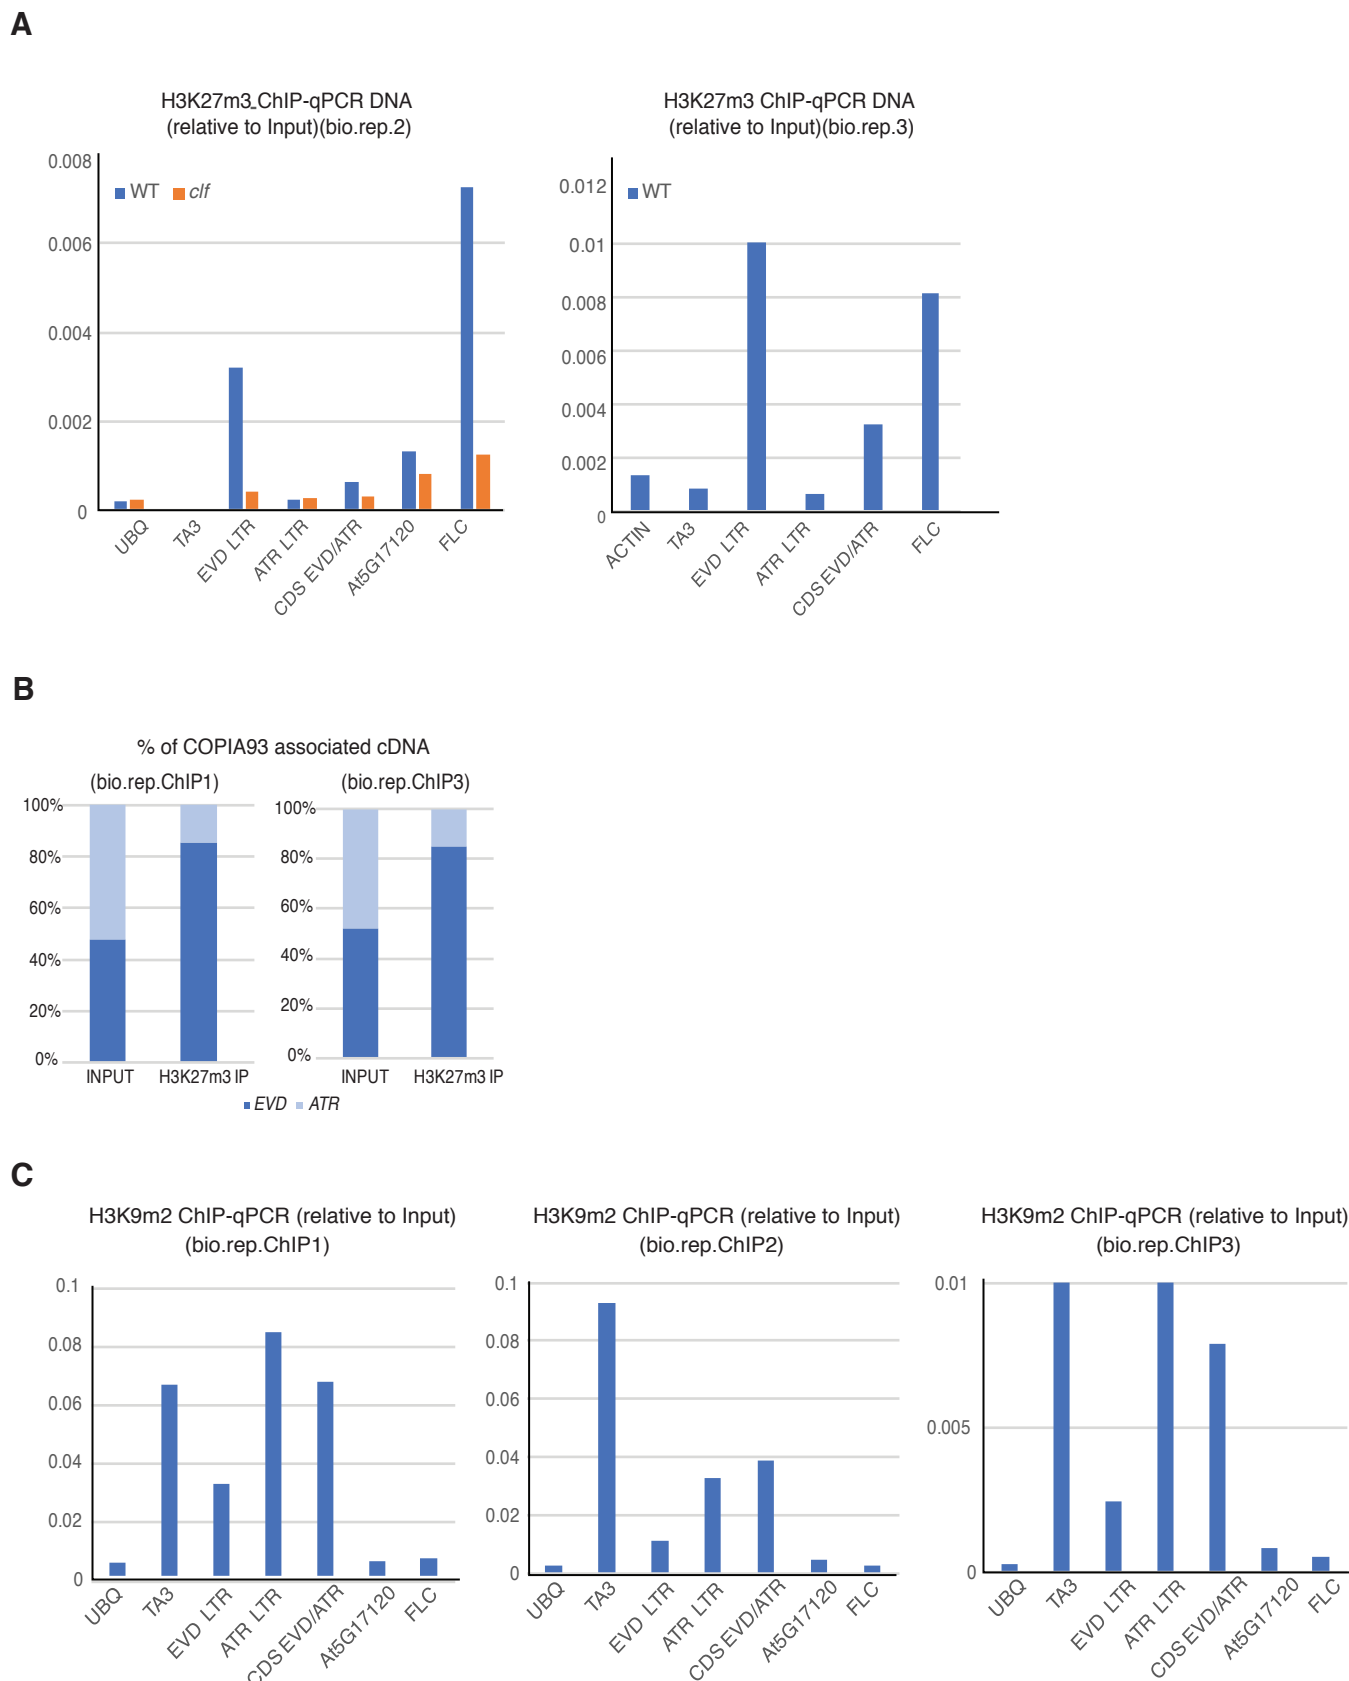

**Figure EV3.**

**A.** Additional biological replicates for H3K27m3 analysis at *ATCOPIA93* by ChIP-qPCR. The ChIPs were performed with different amounts of starting material for each batch (bio.rep.) which contributes to explain the differences in ChIP efficiency. Left panel: biological replicate for loss of H3K27m3 marks in *clf*; right panel: additional biological replicate that was used for pyrosequencing of H3K27m3-immunoprecipitated DNA in wild-type plants.

**B.** Detail of pyrosequencing replicates on H3K27m3 ChIP-DNA at *ATCOPIA93* CDS.

**C.** Analysis of H3K9m2 marks at *ATCOPIA93* EVD and ATR by ChIP in rosette leaves, followed by qPCR. Data were normalized to the Input DNA. Loci tested are as in Fig 3B. Because of variability in the ChIP efficiency, the three biological replicates are shown separately.



**A**

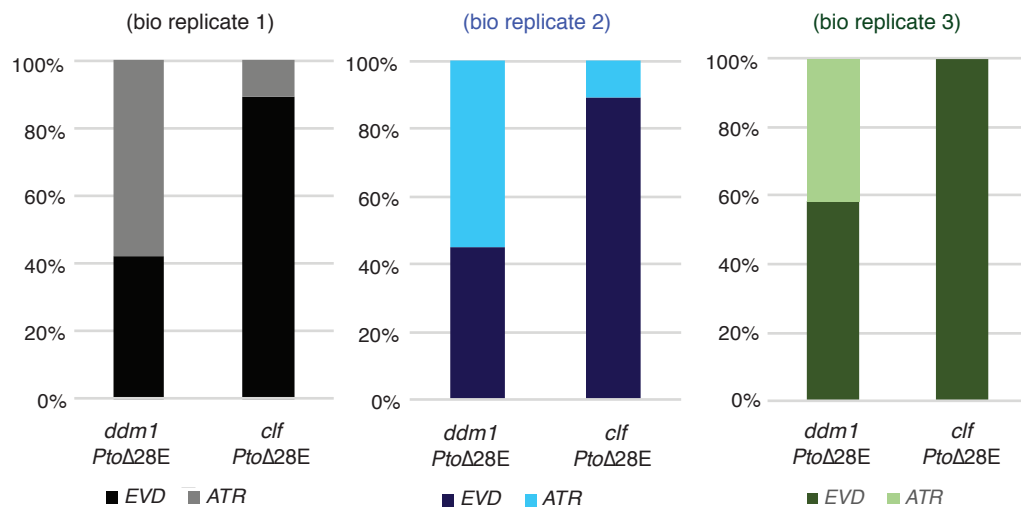

**B**

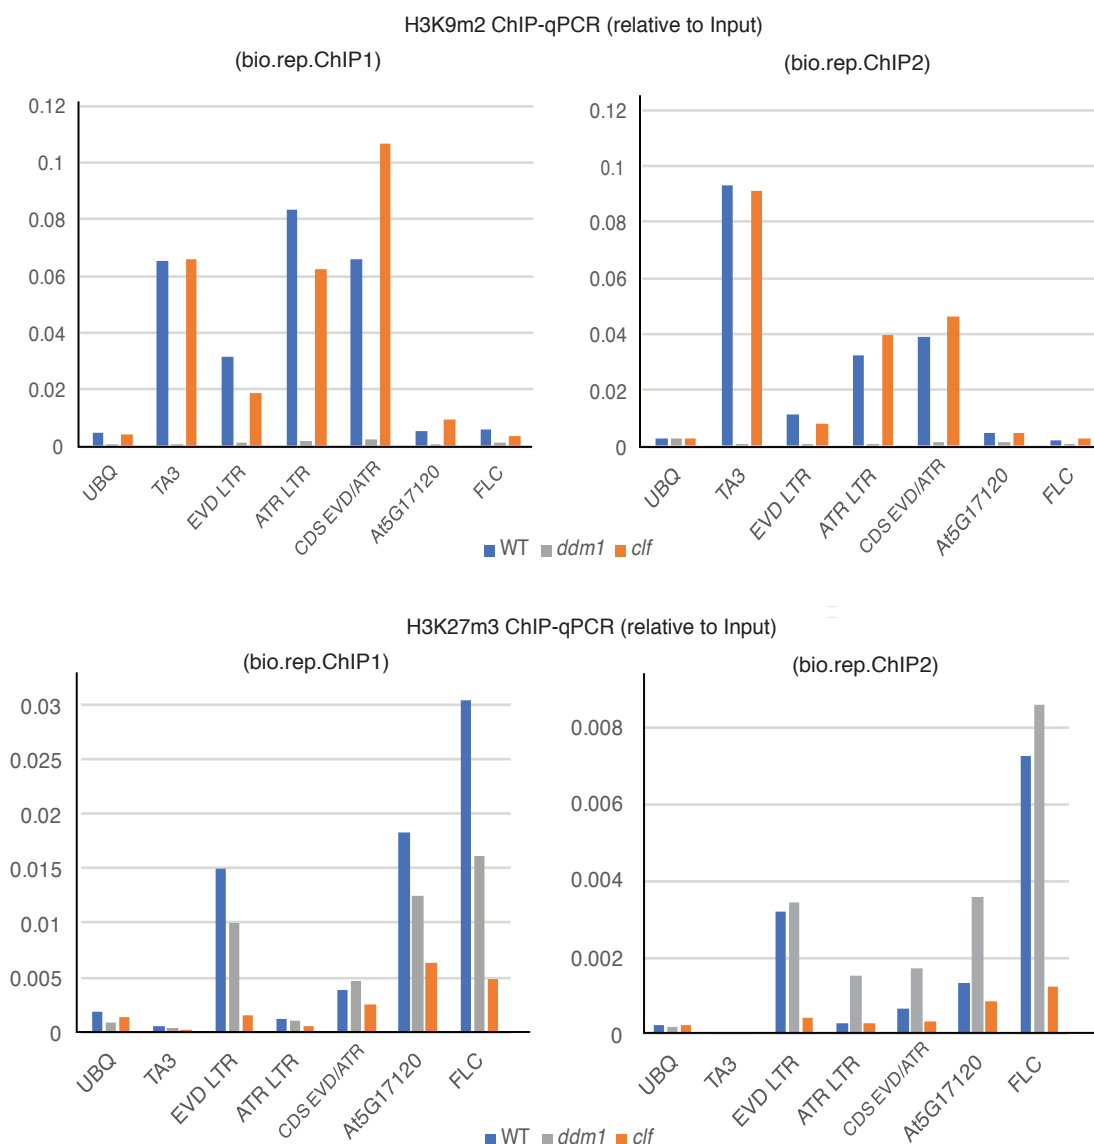

**Figure EV4.**

**A.** Detail of the pyrosequencing biological replicates for *ATCOPIA93* cDNA analysis. Each color corresponds to each biological replicate shown in Fig 4A.

**B.** Analysis of H3K9m2 and H3K27m3 marks in *clf* and *ddm1* at *ATCOPIA93* EVD and ATR by ChIP in rosette leaves, followed by qPCR. Data were normalized to the Input DNA. Two biological replicates are presented. ChIPs were performed in parallel in WT, *ddm1* and *clf* samples. The analysis of the WT ChIP DNA is already presented in Fig 3B and Fig EV3C (bio.rep.1 and 2) for comparisons between LTR and CDS, and between EVD and ATR. Here, the *ddm1* and *clf* data were included to show that H3K9m2 marks persist in *clf* mutant (and, as expected, are almost absent in the *ddm1* negative control) and H3K27m3 marks persist in *ddm1* (and are strongly reduced in *clf* as already shown in Fig 3B).

**A**

| COPIA93 soloLTR | Chr/ Strand | size   | mC  | H3K27m3   | W box (WRKY binding) | Transcription detected during immune response |
|-----------------|-------------|--------|-----|-----------|----------------------|-----------------------------------------------|
| Solo1           | Chr3 (+)    | 406 bp | no  | no        | W1                   | LTR: yes<br>Downstream: yes (pseudogene)      |
| Solo2           | Chr3 (-)    | 406 bp | no  | yes (low) | W1+W2                | LTR: no<br>Downstream: yes (intergenic)       |
| Solo3           | Chr3 (-)    | 378 bp | yes | yes (low) | W1                   | LTR: yes<br>Downstream: no                    |
| Solo4           | Chr3 (+)    | 270 bp | no  | no        | W2                   | LTR: no<br>Downstream: no                     |
| Solo5           | Chr4 (-)    | 407 bp | no  | no        | W1                   | LTR: yes<br>Downstream: yes ( <i>RPP4</i> )   |

**B**

*RPP4* mRNA (6hpi)

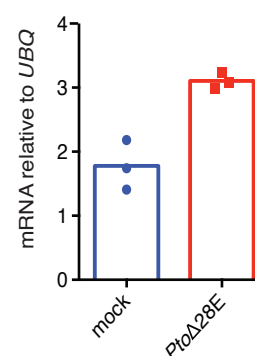

**C**

LTR EVD tattgatcaagactcaata-----agaaaggcctagtattg  
soloLTR5 --TTGATcaagattcaataagagattcatccgtacaaataaggagaaggcctagtattg

LTR EVD gatattgtactacaagagagtgggccaaacatatgagaagtctatgaagagcttctagaag  
soloLTR5 ggtatgtgtctacaaggagttgggccaacacatgagaagtctatggagagcttctagaaa

LTR EVD aggtgaaggcacacaaatatctctttagccgttgaagaggactcacgagtgctctttagc  
soloLTR5 gagtgaaggcgacacaaatatctctttagccgttgaagaggactcacgagtgctctttagc

W-box 1      W-box 2

LTR EVD aacaaggtcaaccaatgaccagtcactctcatcaccaagaccaaggaacctcttctotta  
soloLTR5 gacatggtcaaccaagaccagtcgctctcaccatcaagaccaaggaacctcttctotta

LTR EVD tgtctctttcagttctacgttaattgtaaacagccatattctcttctgtgtctttaa  
soloLTR5 tgtctctttcagttctacgttaattgtaaacggctcatattcccttctgtgtctttaa

LTR EVD gcattgtaaacacacaaagggttactatctaatctatcaaatgatttggtctcatattc  
soloLTR5 acattgtaaacacacaaagggttactaactaatctatcaaatgatttggtc-----attc

LTR EVD tctcacatata--aactctcttcttctcataaactctcttaattcttaatacaattccgc  
soloLTR5 tcaactcatataccaactctcttcttctcataaactctcttactcttctgctacaattccgc

LTR EVD atattcttttcat--ggatcatagagcataagatcatgtctttatgcttataaatc 447  
soloLTR5 atattctttcattatatacaaggacaactgataacca----- 451

**Figure EV5.**

**A.** Summary of the characteristics of the *ATCOPIA93*-derived soloLTRs in Col-0 wild-type plants. chr: chromosome; (+): plus strand; (-): minus strand; mC: methylated cytosines. Methylation status at cytosines was inferred from inspection of public data at unique reads ([http://neomorph.salk.edu/arabidopsis\\_methylomes/stressed\\_ath\\_methylomes.html](http://neomorph.salk.edu/arabidopsis_methylomes/stressed_ath_methylomes.html)); trimethylation status of H3K27 was inferred from inspection of both ChIP-chip (Deleris *et al.*, 2012) and ChIP-seq data for unique reads (Wang *et al.*, 2016). Transcription downstream of the soloLTRs was inspected in plants treated with various bacteria ([http://neomorph.salk.edu/arabidopsis\\_methylomes/stressed\\_ath\\_methylomes.html](http://neomorph.salk.edu/arabidopsis_methylomes/stressed_ath_methylomes.html)) (Dowen *et al.*, 2012); in addition, *RPP4* induction was observed in *PtoΔ28E*-treated plants (Fig EV5B) and in response to various bacterial and oomycete elicitors (<https://bar.utoronto.ca/eplant>).

**B.** *RPP4* mRNA levels in wild-type plants, at 6hpi with either water or *PtoΔ28E* bacteria. Two similar rosette leaves of three plants were used per condition. Values were determined by RT-qPCR and are relative to the expression of the *UBIQUITIN* (*At2g36060*) gene. Three independent biological replicates are shown.

**C.** Alignment between the soloLTR-5 (upstream of *RPP4*) and the EVD/ATR soloLTR. The W-box 1 (GGTCAA), which is conserved in both, is depicted in blue.
